# Supplementary material for: Post hoc study to investigate the potential causes of poor quality of cardiovascular medicines collected in sub-Saharan countries
Source: PubMed Central journal article supplement — BMJ Open. 2020 Nov 9;10(11):e039252. doi: 10.1136/bmjopen-2020-039252 (PMC7654128; doi:10.1136/bmjopen-2020-039252), 2020-11-09
Supplement: bmjopen-2020-039252.draft_revisions.pdf [file bmjopen-2020-039252.draft_revisions.pdf]

# BMJ Open

BMJ Open is committed to open peer review. As part of this commitment we make the peer review history of every article we publish publicly available.

When an article is published we post the peer reviewers' comments and the authors' responses online. We also post the versions of the paper that were used during peer review. These are the versions that the peer review comments apply to.

The versions of the paper that follow are the versions that were submitted during the peer review process. They are not the versions of record or the final published versions. They should not be cited or distributed as the published version of this manuscript.

BMJ Open is an open access journal and the full, final, typeset and author-corrected version of record of the manuscript is available on our site with no access controls, subscription charges or pay-per-view fees (<http://bmjopen.bmj.com>).

If you have any questions on BMJ Open's open peer review process please email [info.bmjopen@bmj.com](mailto:info.bmjopen@bmj.com)

# BMJ Open

## Contribution of unsuitable packaging and uncontrolled circuits and exposures to the poor quality of medicines collected in sub-Saharan countries

|                               |                                                                                                                                                                                                                                                                                                                                                                                                                                                                                                                                                                                                                                                                                                                                                                                                                                                                                                                                                                                                                                                                                                                                                                                                                                                                                                                                                                                                                                                                                                                                                                                                                                                                                                                                                                    |
|-------------------------------|--------------------------------------------------------------------------------------------------------------------------------------------------------------------------------------------------------------------------------------------------------------------------------------------------------------------------------------------------------------------------------------------------------------------------------------------------------------------------------------------------------------------------------------------------------------------------------------------------------------------------------------------------------------------------------------------------------------------------------------------------------------------------------------------------------------------------------------------------------------------------------------------------------------------------------------------------------------------------------------------------------------------------------------------------------------------------------------------------------------------------------------------------------------------------------------------------------------------------------------------------------------------------------------------------------------------------------------------------------------------------------------------------------------------------------------------------------------------------------------------------------------------------------------------------------------------------------------------------------------------------------------------------------------------------------------------------------------------------------------------------------------------|
| Journal:                      | <i>BMJ Open</i>                                                                                                                                                                                                                                                                                                                                                                                                                                                                                                                                                                                                                                                                                                                                                                                                                                                                                                                                                                                                                                                                                                                                                                                                                                                                                                                                                                                                                                                                                                                                                                                                                                                                                                                                                    |
| Manuscript ID                 | bmjopen-2020-039252                                                                                                                                                                                                                                                                                                                                                                                                                                                                                                                                                                                                                                                                                                                                                                                                                                                                                                                                                                                                                                                                                                                                                                                                                                                                                                                                                                                                                                                                                                                                                                                                                                                                                                                                                |
| Article Type:                 | Original research                                                                                                                                                                                                                                                                                                                                                                                                                                                                                                                                                                                                                                                                                                                                                                                                                                                                                                                                                                                                                                                                                                                                                                                                                                                                                                                                                                                                                                                                                                                                                                                                                                                                                                                                                  |
| Date Submitted by the Author: | 08-Apr-2020                                                                                                                                                                                                                                                                                                                                                                                                                                                                                                                                                                                                                                                                                                                                                                                                                                                                                                                                                                                                                                                                                                                                                                                                                                                                                                                                                                                                                                                                                                                                                                                                                                                                                                                                                        |
| Complete List of Authors:     | <p>Secretan, Philippe-Henri; INSERM U970, Paris Centre de Recherche Cardiovasculaire (PARCC), Université de Paris, Paris, France<br/> Antignac, Marie; INSERM U970, Paris Centre de Recherche Cardiovasculaire (PARCC), Université de Paris, Paris, France; Hospital Saint-Antoine, Department of pharmacy, Paris, France<br/> YAGOUBI, Najet; Université Paris-Sud Faculté de Pharmacie, Laboratoire Matériaux et Santé, EA 401, Chatenay-Malabry, France<br/> BERNARD, Melisande; AP-HP, Agence Générale des Equipements et Produits de Sante, department of laboratories, Paris, France<br/> PERIER, Marie Cécile; INSERM U970, Paris Centre de Recherche Cardiovasculaire (PARCC), Université de Paris, Paris, France<br/> TAKOMBE, Jean Laurent; Ngalemia Clinic, Kinshasa, The Democratic Republic of the Congo<br/> BALDE, Dadhi ; Hospital Ignace Deen, Department of cardiology, Conakry, Guinea<br/> N'GUETTA, Roland; University Hospital Center of Treichville, Institut de cardiologie d'Abidjan, Abidjan, Cote d'Ivoire<br/> IKAMA, Méo Stéphane; University Hospital Center of Brazzaville, Departement of cardiology, Brazzaville, Congo<br/> ZABSONRE, Patrice; Centre Hospitalier Universitaire Yalgado Ouédraogo, Department of cardiology, Ouagadougou, Burkina Faso<br/> SIDI ALY, Abdallah; Cardiology Clinics, Nouakchott, Mauritania<br/> JOUVEN, Xavier; INSERM U970, Paris Centre de Recherche Cardiovasculaire (PARCC), Université de Paris, Paris, France; Hopital Europeen Georges Pompidou, Department of cardiology, Paris, France<br/> DO, Bernard; Université Paris-Sud Faculté de Pharmacie, Laboratoire Matériaux et Santé, EA 401, Chatenay-Malabry, France; Henri Mondor Hospital Department of Pharmacy, Creteil, France</p> |
| Keywords:                     | Quality in health care < HEALTH SERVICES ADMINISTRATION & MANAGEMENT, PUBLIC HEALTH, Toxicity < THERAPEUTICS                                                                                                                                                                                                                                                                                                                                                                                                                                                                                                                                                                                                                                                                                                                                                                                                                                                                                                                                                                                                                                                                                                                                                                                                                                                                                                                                                                                                                                                                                                                                                                                                                                                       |
|                               |                                                                                                                                                                                                                                                                                                                                                                                                                                                                                                                                                                                                                                                                                                                                                                                                                                                                                                                                                                                                                                                                                                                                                                                                                                                                                                                                                                                                                                                                                                                                                                                                                                                                                                                                                                    |

SCHOLARONE™  
Manuscripts

1  
2  
3  
4  
5  
6  
7  
8  
9  
10  
11  
12  
13  
14  
15  
16  
17  
18  
19  
20  
21  
22  
23  
24  
25  
26  
27  
28  
29  
30  
31  
32  
33  
34  
35  
36  
37  
38  
39  
40  
41  
42  
43  
44  
45  
46  
47  
48  
49  
50  
51  
52  
53  
54  
55  
56  
57  
58  
59  
60

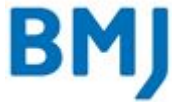

I, the Submitting Author has the right to grant and does grant on behalf of all authors of the Work (as defined in the below author licence), an exclusive licence and/or a non-exclusive licence for contributions from authors who are: i) UK Crown employees; ii) where BMJ has agreed a CC-BY licence shall apply, and/or iii) in accordance with the terms applicable for US Federal Government officers or employees acting as part of their official duties; on a worldwide, perpetual, irrevocable, royalty-free basis to BMJ Publishing Group Ltd ("BMJ") its licensees and where the relevant Journal is co-owned by BMJ to the co-owners of the Journal, to publish the Work in this journal and any other BMJ products and to exploit all rights, as set out in our [licence](#).

The Submitting Author accepts and understands that any supply made under these terms is made by BMJ to the Submitting Author unless you are acting as an employee on behalf of your employer or a postgraduate student of an affiliated institution which is paying any applicable article publishing charge ("APC") for Open Access articles. Where the Submitting Author wishes to make the Work available on an Open Access basis (and intends to pay the relevant APC), the terms of reuse of such Open Access shall be governed by a Creative Commons licence – details of these licences and which [Creative Commons](#) licence will apply to this Work are set out in our licence referred to above.

Other than as permitted in any relevant BMJ Author's Self Archiving Policies, I confirm this Work has not been accepted for publication elsewhere, is not being considered for publication elsewhere and does not duplicate material already published. I confirm all authors consent to publication of this Work and authorise the granting of this licence.

1  
2  
3  
4  
5 1 Contribution of unsuitable packaging and uncontrolled circuits  
6  
7  
8  
9 2 and exposures to the poor quality of medicines collected in sub-  
10  
11  
12  
13  
14 3 Saharan countries  
15  
16  
17

18 4 Philippe-Henri Secretan<sup>1</sup>, Marie Antignac<sup>1,2</sup>, Najet Yagoubi<sup>3</sup>, Melisande Bernard<sup>4</sup>, Marie-  
19 5 Cecile Perier<sup>1</sup>, Jean Laurent Takombe<sup>5</sup>, Dadhi Baldé<sup>6</sup>, Roland N'Guetta<sup>7</sup>, Méo Stéphane  
20 6 Ikama<sup>8</sup>, Patrice Zabsonre<sup>9</sup>, Abdallahi Sidi Aly<sup>10</sup>, Xavier Jouven<sup>1,11</sup> and Bernard Do<sup>3,12</sup>.

21  
22  
23 7 1 Paris Cardiovascular Research Centre, INSERM U970, Paris, France

24  
25 8 2 Department of Pharmacy, Saint-Antoine Hospital, HUEP, AP-HP, Paris, France

26  
27 9 3 Faculty of Pharmacy, Paris-Sud University, UA 401 Matériaux et Santé, Chatenay-Malabry,  
28 10 France

29  
30 11 4 Department of Laboratories, Agence Générale des Equipements et Produits de Sante, AP HP,  
31 12 Paris, France

32  
33 13 5 Clinique Ngaliema, Kinshasa, Democratic Republic of Congo

34  
35 14 6 Department of Cardiology, Ignace Deen hospital, Conakry, Guinea

36  
37 15 7 Cardiology institute of Abidjan, Treichville hospital, Abidjan, Côte d'Ivoire

38  
39 16 8 Department of Cardiology, Brazzaville hospital, Brazzaville, Congo

40  
41 17 9 Yalgado Ouédraogo hospital, Ouagadougou, Burkina Faso

42  
43 18 10. Department of Cardiology, Nouakchott, Mauritanie

44  
45 19 11 Department of Cardiology, European Georges Pompidou Hospital, AP-HP, Paris, France

46  
47 20 12 Department of Pharmacy, Henri Mondor Hospital, AP-HP, Créteil, France

48  
49  
50  
51  
52  
53  
54  
55  
56  
57 21  
58  
59  
60

## 22 Abstract

### 23 Introduction

24 The incidence of cardiovascular diseases is increasing and there is a growing need to provide  
25 access to quality cardio drugs in Africa. In the SEVEN study, we analysed 1530 cardiovascular  
26 drug samples randomly collected from ten African countries. By that time, of the seven drugs  
27 products analysed, only those containing amlodipine and captopril had very low assay values  
28 with active substance contents that could be less than 75% of those expected. In this article  
29 we investigate complementary aspects of the amlodipine and captopril samples so to explain  
30 the previously observed low assays for these two drugs.

### 31 Methods

32 The chromatograms of drug products (amlodipine : n=305 ; captopril : n=235) obtained during  
33 the SEVEN study were reprocessed to quantify the relative amounts (% w/w) of impurities and  
34 assign their structures. Identification of the main compounds of the drugs packaging was  
35 performed by use of infrared spectroscopy.

### 36 Results

37 Chromatogram analysis showed that 40 amlodipine tablets and 31 captopril tablets contained  
38 at least one impurity exceeding the recommended thresholds. The low levels previously  
39 observed in several samples could be the result of the use of a degraded drug substance in  
40 the manufacture and/or degradation of the drug product due to uncontrolled exposure.

1  
2  
3 41 Identification of the blister packaging of the samples led to separate both amlodipine and  
4  
5 42 captopril drug samples in two groups. Mann Whitney's bilateral test showed a significant  
6  
7  
8 43 difference ( $p < 0.0001$ ) between the median value of the captopril dosage when tablets are  
9  
10 44 packaged in blisters providing higher protection to humidity ( $n=105$ ) as opposed to the tablets  
11  
12  
13 45 packaged in blisters providing lower humidity protection ( $n=130$ ).

## 16 46 Conclusion

17  
18  
19  
20 47 Based on these results, particular attention should be paid to the materials and types of  
21  
22 48 packaging used in order to minimize the lack of control over the exposures and drug circuits  
23  
24  
25 49 present in these different countries.

## 29 50 Article summary : strengths and limitations of this study

- 33 51 • Complementary investigation of results obtained during the Seven study, during which  
34  
35 52 1530 cardiovascular drug samples were prospectively collected in licensed and  
36  
37  
38 53 unlicensed places of sale in Africa
- 40 54 • The specifically low amounts for two drugs, amlodipine and captopril, may be due to  
41  
42  
43 55 degradation during storage and lack of drug protection of these sensitive drugs
- 44  
45 56 • Degradation products and impurities quantities were above the recommended  
46  
47  
48 57 thresholds in some amlodipine and captopril samples, raising potential concern about  
49  
50 58 the toxicity of the drugs
- 51  
52  
53 59 • Packaging providing high protection from residual humidity could be a leverage to  
54  
55 60 reduce the presence of degraded amlodipine and captopril drugs on the African soil

- 1  
2  
3 61 • Other studies should confirm, on these two sensitive drugs and other, that packaging  
4  
5 62 providing better protection could be a mean to provide safer drugs in Africa  
6  
7  
8  
9

## 10 63 1. Introduction

11  
12  
13  
14 64 Substandard drugs generally pose a serious health concern from several perspectives and this  
15  
16 65 is particularly prevalent in developing countries where control regulations are poorly  
17  
18 66 developed. Numerous cases of quality defects have been reported<sup>1,2</sup>, mostly in connection  
19  
20 67 with anti-infective drugs<sup>3</sup>. However, since cardiovascular diseases are currently the most  
21  
22 68 important non-communicable diseases in most low- and middle-income countries, it is critical  
23  
24 69 to ensure that these diseases are addressed in a comprehensive manner<sup>4</sup>. Thus, under the  
25  
26 70 impulse of X. Jouven, the study named SEVEN has been set up with the aim of evaluating the  
27  
28 71 quality of the cardiovascular drugs present in ten African countries<sup>5-7</sup>, by exploring the case  
29  
30 72 of 7 commonly used cardiac drugs, namely acenocoumarol, simvastatin, furosemide,  
31  
32 73 hydrochlorothiazide, captopril, atenolol and amlodipine. Examination of the identity and assay  
33  
34 74 of the active substances in the various samples collected revealed that among the products  
35  
36 75 tested, only those based on amlodipine and captopril had very low active substance content  
37  
38 76 that could be less than 75% of those expected<sup>6</sup>. The observation that the biggest quality  
39  
40 77 defects were highlighted and circumscribed around these two molecules motivated the team  
41  
42 78 to seek additional information in particular regarding their stability as well as related elements  
43  
44 79 such as packaging, version of drug (i.e. generic versus brand) and place of manufacture.  
45  
46  
47  
48  
49  
50  
51  
52  
53

54 80 For drugs where the quality defect is unintentional, according to Johnston et al, low dosage  
55  
56 81 levels of active substance may be the result of a variety of factors, including inadequate  
57  
58 82 package design or quality<sup>2</sup>. Yet, despite the fact that the influence of packaging changes on  
59  
60



1  
2  
3 83 the stability of medicinal products is now well established<sup>8,9</sup>, to the best of our knowledge,  
4  
5 84 the studies of the quality of real field samples have so far focused only on dosage units without  
6  
7  
8 85 taking into account the type of packaging used or their chemical composition<sup>3</sup>. However, the  
9  
10 86 concept of packaging is equally important to assess, especially since the drug products need  
11  
12  
13 87 to be kept stable in difficult climatic conditions, where, for example, residual moisture can  
14  
15 88 reach 88% in sub-Saharan Africa<sup>10</sup> and the ability of a plastic blister pack to protect a drug  
16  
17 89 from moisture is highly dependent on its design and composition<sup>11</sup>.

20  
21 90 It is in this context that this study was taking place considering samples of captopril and  
22  
23 91 amlodipine products, collected as part of the SEVEN study<sup>5-7</sup>, as tracer products. On these  
24  
25 92 various samples was carried out the search for degradation products and/or chromatographic  
26  
27 93 related substances as well as the identification of the packaging actually present on the  
28  
29 94 products collected in several African countries, by trying, where possible and relevant, to  
30  
31 95 reconcile the different data and make them meaningful in relation to the potential causes of  
32  
33 96 underdosing previously highlighted for these two drugs.  
34  
35  
36  
37  
38  
39

## 40 97 2. Material and method

### 45 98 2.1 Sample collection

46 99 The methodology and design of the samples collection are described in detail in the articles  
47  
48 100 published in the context of the SEVEN study<sup>5-7</sup>. A multidisciplinary collaborative team of  
49  
50 101 epidemiologists, cardiologists and pharmacists from France and Africa conceived and  
51  
52 102 designed the study. It was registered with the French national drug agency (Agence Nationale  
53  
54 103 Sécurité du Médicament ID\_RCB:2014-A01275-42).

1  
2  
3 104 1530 drugs samples, including 235 captopril and 305 amlodipine drug samples, were collected  
4  
5  
6 105 as per the Guidelines for Field Surveys of the Quality of Medicines<sup>12</sup>. 10 countries were  
7  
8 106 concerned: Benin, Burkina Faso, Congo, Democratic Republic of the Congo, Guinea, Côte  
9  
10 107 d'Ivoire, Mauritania, Niger, Senegal and Togo. In these countries, samples were obtained from  
11  
12 108 licensed (pharmacy) sources selected randomly and unlicensed (street market) places of sale  
13  
14  
15 109 chosen as per the local investigator's convenience. Drug samples were purchased in the  
16  
17 110 capital city and when possible in one city located close to the country's border. Medicines  
18  
19 111 were obtained by the study investigator's staff who posed as customers. For each drug  
20  
21 112 sample, investigators were asked to collect generic versions and brand name versions of the  
22  
23 113 drug if available. After purchase, all drugs were stored at ambient temperature, in a dry place  
24  
25 114 avoiding direct sunlight. Samples were sent via courier to the coordinating centre in France.  
26  
27  
28  
29  
30

## 31 115 2.2 Reagents and sample preparation

32  
33 116 Amlodipine besylate, captopril, iodine, sodium thiosulfate and triethylamine (>99% pure)  
34  
35 117 were purchased from Sigma Aldrich (St. Quentin Fallavier, France). Analytical grade  
36  
37 118 acetonitrile and methanol came from VWR Prolabo® Chemicals (Fontenay-sous-Bois, France).  
38  
39 119 Ultrapure water was produced by the Q-Pod Milli-Q® system (Millipore, Molsheim, France).  
40  
41 120 The stationary phase consisted of a Kinetex® (Phenomenex, Torrance, U.S.A.) C18 column (4.6  
42  
43 121 mmx250 mm, i.d., 5 µm).  
44  
45  
46  
47  
48  
49 122 Standard solutions were prepared as per the recommendations provided in the United States  
50  
51 123 Pharmacopeia (USP) monograph of amlodipine besylate and captopril tablets. Captopril  
52  
53 124 disulfide was obtained by using the protocol proposed in the European Pharmacopeia (Ph.  
54  
55 125 Eur.) monograph of captopril.  
56  
57  
58  
59  
60

### 126 2.3. Analytical conditions and data analysis

127 Chromatographic analyses were performed using a Dionex Ultimate 3000 system (DIONEX,  
128 Ulis, France) coupled to a diode array detector. Chromatographic conditions as well as  
129 suitability tests were performed as per the recommendations provided in the monograph of  
130 amlodipine tablet (USP) and captopril (Ph. Eur.).

131 Identification of blisters was achieved using Fourier Transformed Infrared Spectroscopy (FTIR).  
132 FTIR Perkin-Elmer Spectrum 2000® spectrometer (Villebon-sur-Yvette, France) with a diamond  
133 crystal. Resolution, scan range and number of accumulated scans per spectrum were set to  
134  $0.5\text{ cm}^{-1}$ , 4000 to  $400\text{ cm}^{-1}$  and 3, respectively. Spectrum were acquired on each side of the  
135 blisters using attenuated total reflectance mode.

136 All statistical tests were performed using GraphPad Prism version 8.3.1. for Windows  
137 (GraphPad Software, La Jolla California, USA). Nonparametric Spearman's correlation  
138 coefficient ( $r$ ) was calculated to measure the strength of the association between the peak  
139 surface area of captopril and that of captopril disulfide. Mann-Whitney tests were used to  
140 compare the median between drugs with lower and those with higher protection from  
141 humidity packaging blisters.

## 142 3. Results and discussion

### 143 3.1. Chromatographic purity profiles of the drugs

#### 144 3.1.1. Captopril samples

1  
2  
3 145 The qualitative study of the chromatograms of the 235 captopril drug samples showed that  
4  
5  
6 146 the 31 samples with drug amounts inferior to 90% (w/w%) contained the same impurity (Fig.  
7  
8 147 1). The detected impurity was assigned to captopril disulfide as it had the same retention time  
9  
10 148 than this compound.

11  
12  
13  
14 149 Fig. 1: typical chromatographic profiles of captopril solutions: reference active substance  
15  
16 150 standard solution (black), typical substandard drug sample (blue).

17  
18  
19  
20 151 Further, for every chromatogram, the sum of the surface of the peak areas corresponding to  
21  
22 152 captopril and that of captopril disulfide led to obtain areas recoveries between 90 and 110%  
23  
24 153 compared to that of the captopril reference solution. Therefore, one could infer that the lack  
25  
26 154 of drug captopril may be linked to the presence of captopril disulfide. As a result, a correlation  
27  
28 155 study between the surface of the peak of captopril and that of captopril disulfide impurity was  
29  
30 156 carried out and yielded a negative Spearman coefficient with a value of -0.613 ( $p=0.0069$ ).

### 36 157 3.1.2. Amlodipine samples

37  
38  
39 158 Unlike captopril, the 305 chromatographic profiles obtained for amlodipine samples strongly  
40  
41 159 differed from one to the other, implying that the drugs did not contain the same impurities  
42  
43 160 (Fig. 2). Indeed, under the analytical conditions recommended in the USP monograph, two  
44  
45 161 categories of chromatographic profiles were obtained as a function of the studied samples.

46  
47  
48  
49  
50 162 A first category of chromatographic profiles consisted of samples containing an impurity with  
51  
52 163 a relative retention time of about 0.5 (Fig 2. a) as compared to amlodipine, referred in the USP  
53  
54 164 as amlodipine related compound A. In 10 chromatograms, the surface of the peak of this  
55  
56 165 impurity exceeded the USP acceptance criteria for this impurity (<1.0 %, w/w).

1  
2  
3 166 The second category of chromatographic profiles comprised a peak with a relative retention  
4  
5 167 time of about 0.8 (Fig 2.b) corresponding to a degradation related impurity, namely an  
6  
7  
8 168 amlodipine-lactose interaction product. For 30 sample solutions, the area of the peak of this  
9  
10 169 impurity compared to that of amlodipine exceeded the USP acceptance criteria for this  
11  
12  
13 170 impurity (<0.5% w/w).

14  
15  
16 171 Fig. 2 : typical chromatographic profiles for samples containing impurity A (a) and samples  
17  
18  
19 172 containing amlodipine-lactose interaction product (b)

### 20 21 22 23 173 3.2. Blisters identification

24  
25  
26 174 The identity and aspect of the blisters materials strongly differed between amlodipine and  
27  
28  
29 175 captopril and within drug samples of the same drug.

30  
31  
32 176 FTIR analysis were performed on each side of the plastic blisters in order to identify its main  
33  
34  
35 177 compounds. Based on the analysis, two groups could be established: those with a spectrum  
36  
37  
38 178 corresponding to polyvinyl-chloride's one (PVC, red and blue spectrum, Fig. 3) and those which  
39  
40  
41 179 have two spectral bands ( $597$  and  $527\text{ cm}^{-1}$ ) characteristic of the polyvinylidene-chloride  
42  
43 180 presence<sup>13</sup> (PVDC, green spectrum, Fig. 3).

44  
45  
46 181 Fig. 3 : typical FTIR spectrum of a PVC polymer packaging with (green spectrum) and without  
47  
48  
49 182 (blue and red spectrum) PVDC.

50  
51  
52 183 The analysis highlighted that 130 out of the 235 captopril drug samples were packaged in  
53  
54  
55 184 blisters containing PVDC and 105 in blisters only composed of PVC. In the case of amlodipine,  
56  
57  
58 185 none of the plastic blisters used to package 245 amlodipine samples contained PVDC (Table  
59  
60

1  
2  
3 186 1). 60 amlodipine samples were packaged in blisters consisting of foil-foil sealed aluminium  
4  
5 187 (Table 1).  
6  
7  
8

9 188 Table 1 : number of amlodipine and captopril drug samples as a function of blister identity  
10  
11

| Blister identity | Amlodipine | Captopril |
|------------------|------------|-----------|
| PVC only         | 60         | 105       |
| Aluminium only   | 245        | None      |
| PVC-PVDC         | None       | 130       |

12  
13  
14  
15  
16  
17  
18  
19  
20  
21  
22  
23 189  
24  
25

### 26 190 3.3. Drugs assays as a function of blister identifications

27 191 From the results obtained in 3.2., captopril assays results were separated based on the  
28  
29 192 presence of PVDC or not (PVC only). Amlodipine assay results were divided in two groups: the  
30  
31 193 group of samples packaged in foil-foil sealed aluminium blisters and the one packaged in PVC  
32  
33 194 blisters (PVC only). The results are provided in figure 4.  
34  
35  
36  
37  
38  
39

40  
41 195 Fig.4 : medians of drug assays with interquartile ranges as a function of the drug and the blister  
42  
43 196 composition, ns: non statistically significant; \*\*\*\*:  $p < 0.0001$ .  
44

45  
46 197 For amlodipine, no statistical difference in dosage ( $p = 0.7684$ ) was observed between the  
47  
48 198 group with foil-foil aluminium packaging (median=96.10,  $n = 60$ ) and the group with PVC blister  
49  
50 199 packaging (median=96.60,  $n = 245$ ).  
51  
52

53  
54 200 For captopril, on the other hand, a statistical difference ( $p < 0.0001$ ) was found between the  
55  
56 201 group of samples stored in blisters containing only PVC (median=100.0,  $n = 105$ ) and those  
57  
58 202 stored in blisters containing PVC/PVDC (median=96.60,  $n = 130$ ).  
59  
60

## 4. Discussion

203  
204 Sub-standard cardiac medicines represent a serious health hazard and result in significant  
205 morbidity and mortality<sup>4</sup>. The SEVEN study was the first major study of cardiovascular drugs  
206 in Sub-Saharan Africa<sup>5-7</sup>. The analysis of samples collected in Africa and through various sales  
207 spots of all kinds showed that among the products used in cardiovascular diseases, about 15-  
208 20% were of low quality, and the prevalence of poor quality is higher for the products  
209 containing amlodipine and captopril. Given this observation and the fact that these two active  
210 substances are particularly sensitive to humidity and heat, the question arose as to whether  
211 the intrinsic stability of the latter had contributed more to the quality defects highlighted at  
212 the time. So, in this follow-up study, we have sought to provide some answers to this question  
213 by focusing on the search of associated degradation products and the nature of the packaging  
214 used at the time of the on-site collections.

215 We therefore sought to supplement the assay results with chromatographic purity studies on  
216 samples of the various cardiological drugs samples collected during the SEVEN study. We  
217 noted that the levels of impurities are particularly high for captopril and amlodipine samples  
218 (>0.5% compared to the considered active substance), as is their high prevalence of  
219 underdosing relative to other products, as previously mentioned. Of course, this problem  
220 could have been caused by the use of poor-quality active ingredient. But the fact that it is  
221 specific to these two active substances did not allow us to limit to this aspect alone. We  
222 therefore also turned our attention to the stability issue and to what goes hand in hand with  
223 this aspect. The identification of chromatographic impurities present concomitantly with the

1  
2  
3 224 active substance was carried out to support our hypotheses related to the degradation of  
4  
5 225 these compounds.  
6  
7  
8

9 226 In the case of the captopril drug samples, the compound detected (Fig. 1) in addition to  
10  
11 227 captopril was identified as captopril disulfide, a well-known degradation product of captopril  
12  
13 228 that is prompt to be formed under moisture and heat<sup>14</sup>. In other words, this would mean that  
14  
15 229 the underdoses initially observed in the captopril products<sup>6</sup> could be attributed to the poor  
16  
17 230 quality of the active substance used and/or, to a larger extent, to degradation occurring either  
18  
19 231 during manufacture and/or during improper storage. However, as it is well depicted that  
20  
21 232 captopril is far more susceptible to degradation in the presence of some excipients than alone  
22  
23 233 <sup>15,16</sup>, one can fathom that the presence of captopril disulfide may more likely result from  
24  
25 234 degradation due to uncontrolled exposure. As for amlodipine, chromatographic analyses  
26  
27 235 showed in 30 samples the presence of an impurity due to amlodipine-lactose interaction (Fig.  
28  
29 236 2 b). Such interaction was shown to occur in time and mostly under high humidity conditions<sup>17</sup>,  
30  
31 237 which could, to some extent, explain the poor assays observed in SEVEN study<sup>7</sup>.  
32  
33  
34  
35  
36  
37  
38

39 238 These results are consistent with data in the literature in that the moisture vapour  
40  
41 239 transmission rate<sup>18</sup> (MVTR) must be controlled as it is critical to the stability of captopril<sup>14</sup> and  
42  
43 240 amlodipine<sup>19</sup>. The corollary is that we have indeed shown, in the case of captopril, a significant  
44  
45 241 difference ( $p < 0.0001$ , Fig. 4) in active substance content between tablets extracted from PVC  
46  
47 242 blisters and those from PVC-PVDC blisters that exhibit lower MVTR<sup>18</sup>. The results for  
48  
49 243 amlodipine are not statistically conclusive, but somehow the trend is noticeable since samples  
50  
51 244 with a peak area of the amlodipine-lactose interaction product greater than 0.5% (w/w) were  
52  
53 245 exclusively from the blisters with higher MVTR i.e. the blisters composed of PVC as opposed  
54  
55 246 to the foil-foil aluminium ones<sup>18</sup>. Accordingly, it can be seen that the use of low moisture  
56  
57  
58  
59  
60



1  
2  
3 247 barrier packaging for these two products among the different cardiac drugs tested appears to  
4  
5 248 have contributed to their low assay values.  
6  
7  
8

9 249 This poor quality, represented by both a lower active substance content and the presence of  
10  
11 250 degradation products, subjects the patient to safety risks. On the one hand, any dose lower  
12  
13  
14 251 than the dose to which the body has developed tolerance may induce an effect that is difficult  
15  
16 252 to predict and may even be contrary to the action of the usual dose<sup>20</sup> and on the other hand,  
17  
18  
19 253 the degradation products formed may be toxic<sup>21</sup>.  
20  
21

22 254 Captopril disulphide is a well-known metabolite of captopril, which can reversibly interconvert  
23  
24  
25 255 into captopril in the blood<sup>22</sup>. However, in human pharmacokinetic studies the amount of  
26  
27 256 captopril disulphide in the blood never exceeds 8% of that of captopril<sup>22,23</sup>. Therefore, clinical  
28  
29  
30 257 consequences of exposure to higher amounts of captopril disulfide are unknown. This is to be  
31  
32 258 considered because the disulfide metabolites of sulfur-based drugs were 50 to 100 times more  
33  
34  
35 259 toxic on hepatocytes from isolated rats than the parent drugs<sup>24</sup>.  
36  
37

38 260 In some amlodipine samples, two main degradation products were detected as mentioned  
39  
40  
41 261 earlier, amlodipine impurity A that corresponds to the oxidation of its dihydropyridine ring  
42  
43 262 and the amlodipine-lactose interaction product. Impurity A has been reported to be among  
44  
45 263 the most found metabolites in urines (7%)<sup>25</sup>. As its level was always inferior to 2% relative to  
46  
47  
48 264 the active substance in the samples analysed, one can assume that this presence may have a  
49  
50  
51 265 limited impact to the patients. As for the amlodipine-lactose interaction product, no data are  
52  
53 266 currently available on its fate in the body and its toxicity, which makes it a risk to consider.  
54  
55

56 267 Overall, on the basis of these additional results from the study of the chromatographic profiles  
57  
58  
59 268 of the collected samples, significant quantities of cardio drugs sold on African soil may not  
60

1  
2  
3 269 only present a lack of efficacy but also safety issues, due to the presence of impurities and/or  
4  
5 270 degradation products resulting from poor storage and packaging conditions.  
6  
7  
8  
9

## 10 271 Conclusion

11  
12 272 Further studies of captopril and amlodipine samples from Africa showed that their low assays  
13  
14 273 would result in part from the degradation of the active substance, which may indicate that  
15  
16  
17 274 protective measures to avoid degradation of the drug products were not commensurate with  
18  
19 275 their unstable behaviour, particularly in the presence of moisture and heat. FTIR analyses of  
20  
21  
22 276 the samples' blisters disclosed they differ in material composition for a same active substance.  
23  
24 277 In the case of captopril, statistical analysis has shown that the active substance content of  
25  
26  
27 278 products in tighter blister packs is higher than that of products in less moisture-resistant  
28  
29 279 packaging. In the case of amlodipine, only the samples with low moisture resistant packaging  
30  
31  
32 280 had high amounts (>0.5% w/w) of degradation products.  
33  
34

35 281 Using packaging with elevated moisture barrier properties could be a significant leverage to  
36  
37 282 reduce the prevalence of substandard drugs in countries where medicines circuit and storage  
38  
39 283 are poorly controlled. It is therefore also important to make the health authorities in these  
40  
41  
42 284 countries aware that the quality of packaging must also be taken into account when evaluating  
43  
44  
45 285 medicines supplied.  
46  
47  
48

## 49 286 Footnotes

### 50 287 Contributors

51  
52 288 All authors have substantial contributions.

53  
54 289 Study concept and design: PH. Secretan, B. Do, M. Antignac and X. Jouven

55  
56 290 Responsible of samples collection: S. Ikama Meo, R. N' Guetta, D. Balde, A. Sidy Ali, P.  
57  
58 291 Zabsonre, JL. Takombe.  
59  
60

- 1  
2  
3 292 Chemical analysis: M. Bernard, B. Do, PH Secretan and Najet Yagoubi.  
4  
5 293 Interpretation of data: all authors.  
6  
7 294 Statistical analysis: PH. Secretan, B. Do, MC Perier, M. Antignac and X. Jouven.  
8  
9 295 Drafting of the manuscript: all authors.  
10  
11 296 Final approval of the version to be published: all authors.  
12

### 13 297 Funding

- 14 298 The SEVEN study was exclusively supported by a public grant:  
15  
16 299 - ANSM (Agence Nationale Sécurité du Médicament) (Grant AAP-2014-042).  
17  
18 300 - INSERM (Institut national de la Santé et de la Recherche Médicale),  
19  
20 301 - AP-HP (Assistance Publique – Hôpitaux de Paris), Paris Descartes University  
21

### 22 302 Competing interests

- 23 303 None.  
24  
25  
26  
27

### 28 304 Patient consent for publication

- 29 305 No patient involved (Not required).  
30  
31  
32

### 33 306 Data sharing statement

- 34 307 No additional data available.  
35  
36  
37  
38  
39  
40  
41  
42  
43  
44  
45  
46  
47  
48  
49  
50  
51  
52  
53  
54  
55  
56  
57  
58  
59  
60

## References

1. Nayyar, G. M. L. *et al.* Falsified and Substandard Drugs: Stopping the Pandemic. *Am. J. Trop. Med. Hyg.* **100**, 1058–1065 (2019).
2. Johnston, A. & Holt, D. W. Substandard drugs: a potential crisis for public health: Substandard drugs. *Br. J. Clin. Pharmacol.* **78**, 218–243 (2014).
3. Almuzaini, T., Choonara, I. & Sammons, H. Substandard and counterfeit medicines: a systematic review of the literature. *BMJ Open* **3**, e002923 (2013).
4. Bowry, A. D. K., Lewey, J., Dugani, S. B. & Choudhry, N. K. The Burden of Cardiovascular Disease in Low- and Middle-Income Countries: Epidemiology and Management. *Can. J. Cardiol.* **31**, 1151–1159 (2015).
5. Antignac, M. *et al.* Quality Assessment of 7 Cardiovascular Drugs in 10 Sub-Saharan Countries: The SEVEN Study. *JAMA Cardiol.* **2**, 223 (2017).
6. Antignac, M. *et al.* Fighting fake medicines: First quality evaluation of cardiac drugs in Africa. *Int. J. Cardiol.* **243**, 523–528 (2017).
7. Macquart de Terline, D. *et al.* Substandard drugs among five common antihypertensive generic medications: an analysis from 10 African countries. *J. Hypertens.* **36**, 395–401 (2018).
8. Khan, M. H. *et al.* Effects of packaging and storage conditions on the quality of amoxicillin-clavulanic acid – an analysis of Cambodian samples. *BMC Pharmacol. Toxicol.* **14**, 33 (2013).
9. Asafu-Adjaye, E. B. *et al.* Comparative stability study of unit-dose repackaged furosemide tablets. *Clin. Res. Regul. Aff.* **28**, 38–48 (2011).

- 1  
2  
3 330 10. Ogbonna, A. C. & Harris, D. J. Thermal comfort in sub-Saharan Africa: Field study report in  
4  
5  
6 331 Jos-Nigeria. *Appl. Energy* **85**, 1–11 (2008).  
7  
8  
9 332 11. Scrivens, G. *et al.* The Humidity Exposure of Packaged Products. in *Accelerated Predictive*  
10  
11 333 *Stability* 105–146 (Elsevier, 2018). doi:10.1016/B978-0-12-802786-8.00005-X.  
12  
13  
14 334 12. Newton, P. N. *et al.* Guidelines for Field Surveys of the Quality of Medicines: A Proposal.  
15  
16 335 *PLOS Med.* **6**, e1000052 (2009).  
17  
18  
19 336 13. Bower, D. I. & Maddams, W. F. *The Vibrational Spectroscopy of Polymers.* (Cambridge  
20  
21 337 University Press, 1989). doi:10.1017/CBO9780511623189.  
22  
23  
24 338 14. França, L. de M. *et al.* NIR hyperspectral imaging to evaluate degradation in captopril  
25  
26 339 commercial tablets. *Eur. J. Pharm. Biopharm.* **104**, 180–188 (2016).  
27  
28  
29  
30 340 15. Tôrres, A. R., Grangeiro, S. & Fragoso, W. D. Multivariate control charts for monitoring  
31  
32 341 captopril stability. *Microchem. J.* **118**, 259–265 (2015).  
33  
34  
35 342 16. Stulzer, H. K., Rodrigues, P. O., Cardoso, T. M., Matos, J. S. R. & Silva, M. A. S. Compatibility  
36  
37 343 studies between captopril and pharmaceutical excipients used in tablets formulations. *J.*  
38  
39 344 *Therm. Anal. Calorim.* **91**, 323–328 (2008).  
40  
41  
42  
43 345 17. Abdoh, A., Al-Omari, M. M., Badwan, A. A. & Jaber, A. M. Y. Amlodipine Besylate–  
44  
45 346 Excipients Interaction in Solid Dosage Form. *Pharm. Dev. Technol.* **9**, 15–24 (2004).  
46  
47  
48  
49 347 18. Waterman, K. C. & Macdonald, B. C. Package Selection for Moisture Protection for Solid,  
50  
51 348 Oral Drug Products. *J. Pharm. Sci.* **99**, 4437–4452 (2010).  
52  
53  
54 349 19. Malcolm, L. Accelerated Stability Assessment Program (ASAP) Applications in a  
55  
56 350 Postapproval Environment. in *Accelerated Predictive Stability* 287–304 (Elsevier, 2018).  
57  
58 351 doi:10.1016/B978-0-12-802786-8.00012-7.  
59  
60

- 1  
2  
3 352 20. Peper, A. Aspects of the Relationship between Drug Dose and Drug Effect. *Dose-Response*  
4  
5 353 7, dose-response.0 (2009).  
6  
7  
8 354 21. Melo, S. R. d. O., Homem-de-Mello, M., Silveira, D. & Simeoni, L. A. Advice on Degradation  
9  
10 355 Products in Pharmaceuticals: A Toxicological Evaluation. *PDA J. Pharm. Sci. Technol.* **68**,  
11  
12 356 221–238 (2014).  
13  
14  
15  
16 357 22. Migdalof, B. H. *et al.* Captopril: Pharmacology, Metabolism, and Disposition. *Drug Metab.*  
17  
18 358 *Rev.* **15**, 841–869 (1984).  
19  
20  
21 359 23. Duchin, K. L., McKinstry, D. N., Cohen, A. I. & Migdalof, B. H. Pharmacokinetics of Captopril  
22  
23 360 in Healthy Subjects and in Patients with Cardiovascular Diseases: *Clin. Pharmacokinet.* **14**,  
24  
25 361 241–259 (1988).  
26  
27  
28  
29 362 24. Jatoe, S. D., Lauriault, V., McGirr, L. G. & O'Brien, P. J. THE TOXICITY OF DISULPHIDES TO  
30  
31 363 ISOLATED HEPATOCYTES AND MITOCHONDRIA. *Drug Metabol. Drug Interact.* **6**, (1988).  
32  
33  
34  
35 364 25. Stopher, D. A., Beresford, A. P., Macrae, P. V. & Humphrey, M. J. The Metabolism and  
36  
37 365 Pharmacokinetics of Amlodipine in Humans and Animals: *J. Cardiovasc. Pharmacol.* **12**,  
38  
39 366 S55–S59 (1988).  
40  
41  
42  
43 367

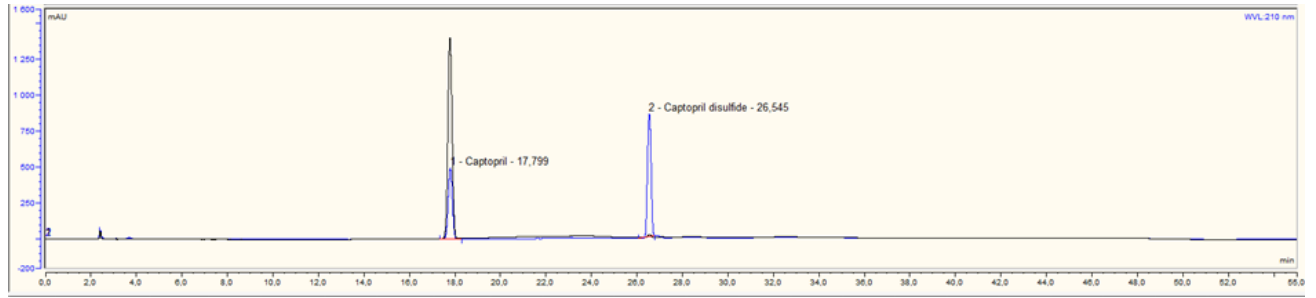

Fig. 1: typical chromatographic profiles of captopril solutions: reference active substance standard solution (black), typical substandard drug sample (blue).

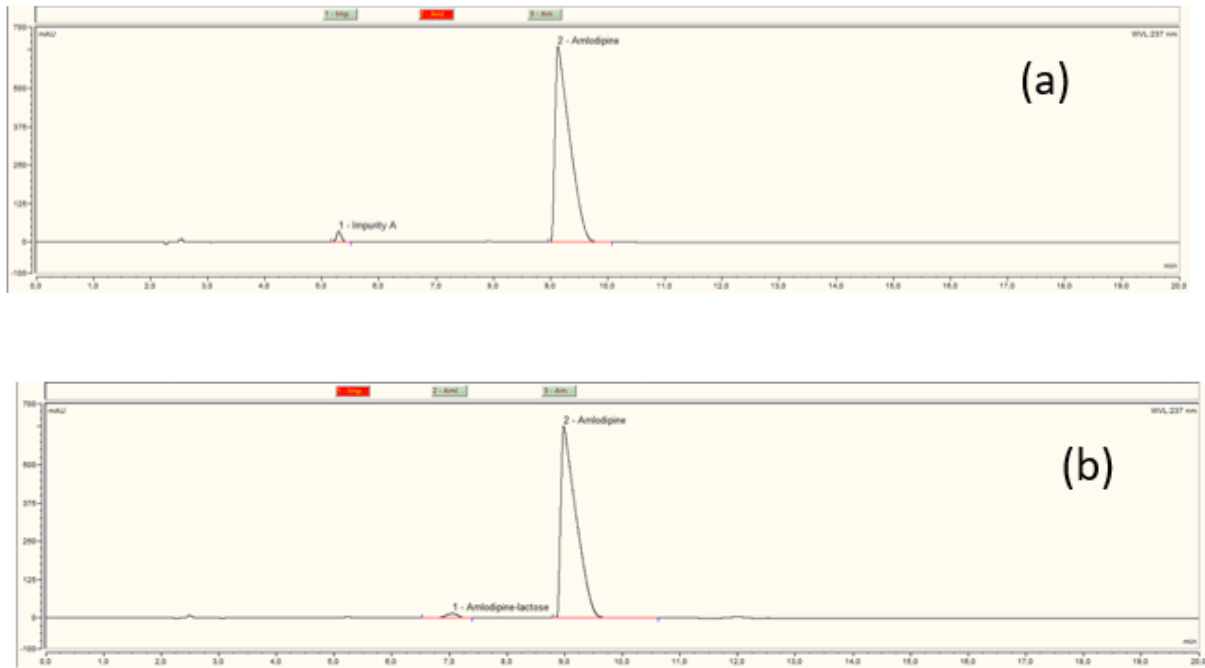

Fig. 2 : typical chromatographic profiles for samples containing impurity A (a) and samples containing amlodipine-lactose interaction product (b)



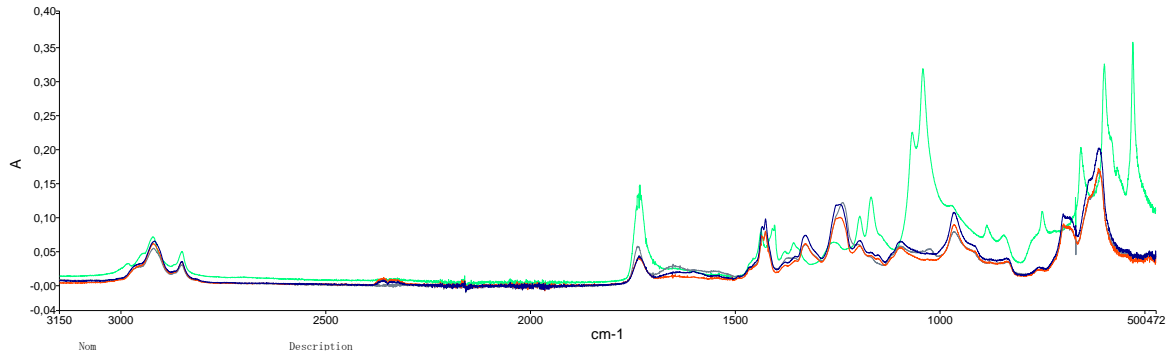

Fig. 3 : typical FTIR spectrum of a PVC polymer packaging with (green spectrum) and without (blue and red spectrum) PVDC.

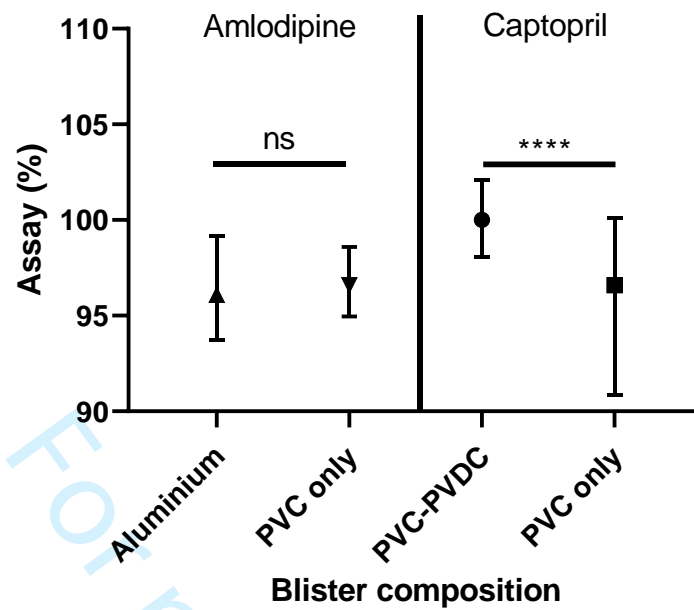

Fig.4 : medians of drug assays with interquartile ranges as a function of the drug and the blister composition, ns: non statistically significant; \*\*\*\*:  $p < 0.0001$ .

# BMJ Open

## A post hoc study to investigate the potential causes of poor quality of cardiovascular medicines collected in sub-Saharan countries

|                                 |                                                                                                                                                                                                                                                                                                                                                                                                                                                                                                                                                                                                                                                                                                                                                                                                                                                                                                                                                                                                                                                                                                                                                                                                                                                                                                                                                                                                                                                                                                                                                                                                                                                                                                                                                                    |
|---------------------------------|--------------------------------------------------------------------------------------------------------------------------------------------------------------------------------------------------------------------------------------------------------------------------------------------------------------------------------------------------------------------------------------------------------------------------------------------------------------------------------------------------------------------------------------------------------------------------------------------------------------------------------------------------------------------------------------------------------------------------------------------------------------------------------------------------------------------------------------------------------------------------------------------------------------------------------------------------------------------------------------------------------------------------------------------------------------------------------------------------------------------------------------------------------------------------------------------------------------------------------------------------------------------------------------------------------------------------------------------------------------------------------------------------------------------------------------------------------------------------------------------------------------------------------------------------------------------------------------------------------------------------------------------------------------------------------------------------------------------------------------------------------------------|
| Journal:                        | <i>BMJ Open</i>                                                                                                                                                                                                                                                                                                                                                                                                                                                                                                                                                                                                                                                                                                                                                                                                                                                                                                                                                                                                                                                                                                                                                                                                                                                                                                                                                                                                                                                                                                                                                                                                                                                                                                                                                    |
| Manuscript ID                   | bmjopen-2020-039252.R1                                                                                                                                                                                                                                                                                                                                                                                                                                                                                                                                                                                                                                                                                                                                                                                                                                                                                                                                                                                                                                                                                                                                                                                                                                                                                                                                                                                                                                                                                                                                                                                                                                                                                                                                             |
| Article Type:                   | Original research                                                                                                                                                                                                                                                                                                                                                                                                                                                                                                                                                                                                                                                                                                                                                                                                                                                                                                                                                                                                                                                                                                                                                                                                                                                                                                                                                                                                                                                                                                                                                                                                                                                                                                                                                  |
| Date Submitted by the Author:   | 11-Aug-2020                                                                                                                                                                                                                                                                                                                                                                                                                                                                                                                                                                                                                                                                                                                                                                                                                                                                                                                                                                                                                                                                                                                                                                                                                                                                                                                                                                                                                                                                                                                                                                                                                                                                                                                                                        |
| Complete List of Authors:       | <p>Secretan, Philippe-Henri; INSERM U970, Paris Centre de Recherche Cardiovasculaire (PARCC), Université de Paris, Paris, France<br/> Antignac, Marie; INSERM U970, Paris Centre de Recherche Cardiovasculaire (PARCC), Université de Paris, Paris, France; Hospital Saint-Antoine, Department of pharmacy, Paris, France<br/> YAGOUBI, Najet; Université Paris-Sud Faculté de Pharmacie, Laboratoire Matériaux et Santé, EA 401, Chatenay-Malabry, France<br/> Bernard, Mélisande; AP-HP, Agence Générale des Equipements et Produits de Sante, department of laboratories, Paris, France<br/> PERIER, Marie Cécile; INSERM U970, Paris Centre de Recherche Cardiovasculaire (PARCC), Université de Paris, Paris, France<br/> TAKOMBE, Jean Laurent; Ngalemia Clinic, Kinshasa, The Democratic Republic of the Congo<br/> BALDE, Dadhi ; Hospital Ignace Deen, Department of cardiology, Conakry, Guinea<br/> N'GUETTA, Roland; University Hospital Center of Treichville, Institut de cardiologie d'Abidjan, Abidjan, Cote d'Ivoire<br/> IKAMA, Méo Stéphane; University Hospital Center of Brazzaville, Departement of cardiology, Brazzaville, Congo<br/> ZABSONRE, Patrice; Centre Hospitalier Universitaire Yalgado Ouédraogo, Department of cardiology, Ouagadougou, Burkina Faso<br/> SIDI ALY, Abdallah; Cardiology Clinics, Nouakchott, Mauritania<br/> JOUVEN, Xavier; INSERM U970, Paris Centre de Recherche Cardiovasculaire (PARCC), Université de Paris, Paris, France; Hopital Europeen Georges Pompidou, Department of cardiology, Paris, France<br/> DO, Bernard; Université Paris-Sud Faculté de Pharmacie, Laboratoire Matériaux et Santé, EA 401, Chatenay-Malabry, France; Henri Mondor Hospital Department of Pharmacy, Creteil, France</p> |
| <b>Primary Subject Heading</b>: | Global health                                                                                                                                                                                                                                                                                                                                                                                                                                                                                                                                                                                                                                                                                                                                                                                                                                                                                                                                                                                                                                                                                                                                                                                                                                                                                                                                                                                                                                                                                                                                                                                                                                                                                                                                                      |
| Secondary Subject Heading:      | Cardiovascular medicine, Public health                                                                                                                                                                                                                                                                                                                                                                                                                                                                                                                                                                                                                                                                                                                                                                                                                                                                                                                                                                                                                                                                                                                                                                                                                                                                                                                                                                                                                                                                                                                                                                                                                                                                                                                             |
| Keywords:                       | Quality in health care < HEALTH SERVICES ADMINISTRATION & MANAGEMENT, PUBLIC HEALTH, Toxicity < THERAPEUTICS, CARDIOLOGY                                                                                                                                                                                                                                                                                                                                                                                                                                                                                                                                                                                                                                                                                                                                                                                                                                                                                                                                                                                                                                                                                                                                                                                                                                                                                                                                                                                                                                                                                                                                                                                                                                           |
|                                 |                                                                                                                                                                                                                                                                                                                                                                                                                                                                                                                                                                                                                                                                                                                                                                                                                                                                                                                                                                                                                                                                                                                                                                                                                                                                                                                                                                                                                                                                                                                                                                                                                                                                                                                                                                    |

1  
2  
3  
4  
5  
6  
7  
8  
9  
10  
11  
12  
13  
14  
15  
16  
17  
18  
19  
20  
21  
22  
23  
24  
25  
26  
27  
28  
29  
30  
31  
32  
33  
34  
35  
36  
37  
38  
39  
40  
41  
42  
43  
44  
45  
46  
47  
48  
49  
50  
51  
52  
53  
54  
55  
56  
57  
58  
59  
60

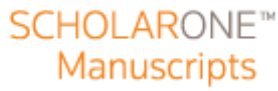

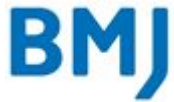

I, the Submitting Author has the right to grant and does grant on behalf of all authors of the Work (as defined in the below author licence), an exclusive licence and/or a non-exclusive licence for contributions from authors who are: i) UK Crown employees; ii) where BMJ has agreed a CC-BY licence shall apply, and/or iii) in accordance with the terms applicable for US Federal Government officers or employees acting as part of their official duties; on a worldwide, perpetual, irrevocable, royalty-free basis to BMJ Publishing Group Ltd ("BMJ") its licensees and where the relevant Journal is co-owned by BMJ to the co-owners of the Journal, to publish the Work in this journal and any other BMJ products and to exploit all rights, as set out in our [licence](#).

The Submitting Author accepts and understands that any supply made under these terms is made by BMJ to the Submitting Author unless you are acting as an employee on behalf of your employer or a postgraduate student of an affiliated institution which is paying any applicable article publishing charge ("APC") for Open Access articles. Where the Submitting Author wishes to make the Work available on an Open Access basis (and intends to pay the relevant APC), the terms of reuse of such Open Access shall be governed by a Creative Commons licence – details of these licences and which [Creative Commons](#) licence will apply to this Work are set out in our licence referred to above.

Other than as permitted in any relevant BMJ Author's Self Archiving Policies, I confirm this Work has not been accepted for publication elsewhere, is not being considered for publication elsewhere and does not duplicate material already published. I confirm all authors consent to publication of this Work and authorise the granting of this licence.

1  
2  
3  
4  
5 1 A post hoc study to investigate the potential causes of poor  
6  
7  
8  
9 2 quality of cardiovascular medicines collected in sub-Saharan  
10  
11  
12  
13  
14 3 countries  
15  
16  
17

18 4 Philippe-Henri Secretan<sup>1</sup>, Marie Antignac<sup>1,2</sup>, Najet Yagoubi<sup>3</sup>, Melisande Bernard<sup>4</sup>, Marie-  
19 5 Cecile Perier<sup>1</sup>, Jean Laurent Takombe<sup>5</sup>, Dadhi Baldé<sup>6</sup>, Roland N'Guetta<sup>7</sup>, Méo Stéphane  
20 6 Ikama<sup>8</sup>, Patrice Zabsonre<sup>9</sup>, Abdallahi Sidi Aly<sup>10</sup>, Xavier Jouven<sup>1,11</sup> and Bernard Do<sup>3,12</sup>.

21  
22  
23 7 1 Paris Cardiovascular Research Centre, INSERM U970, Paris, France

24  
25 8 2 Department of Pharmacy, Saint-Antoine Hospital, HUEP, AP-HP, Paris, France

26  
27  
28 9 3 Faculty of Pharmacy, Paris-Sud University, UA 401 Matériaux et Santé, Chatenay-Malabry,  
29 10 France

30  
31  
32 11 4 Department of Laboratories, Agence Générale des Equipements et Produits de Sante, AP HP,  
33 12 Paris, France

34  
35  
36 13 5 Clinique Ngaliema, Kinshasa, Democratic Republic of Congo

37  
38 14 6 Department of Cardiology, Ignace Deen hospital, Conakry, Guinea

39  
40 15 7 Cardiology institute of Abidjan, Treichville hospital, Abidjan, Côte d'Ivoire

41  
42 16 8 Department of Cardiology, Brazzaville hospital, Brazzaville, Congo

43  
44 17 9 Yalgado Ouédraogo hospital, Ouagadougou, Burkina Faso

45  
46 18 10. Department of Cardiology, Nouakchott, Mauritanie

47  
48 19 11 Department of Cardiology, European Georges Pompidou Hospital, AP-HP, Paris, France

49  
50 20 12 Department of Pharmacy, Henri Mondor Hospital, AP-HP, Créteil, France

51  
52 21 Correspondence to Dr Philippe-Henri Secretan ; phsecretan@yahoo.fr

53  
54  
55  
56  
57  
58  
59 22  
60

## 23 Abstract

### 24 Objectives

25 The incidence of cardiovascular diseases is increasing and there is a growing need to provide  
26 access to quality cardio drugs in Africa. In the SEVEN study, we analysed 1530 cardiovascular  
27 drug samples randomly collected from ten African countries. By that time, of the seven drugs  
28 products analysed, only those containing amlodipine and captopril had very low assay values  
29 with active substance contents that could be less than 75% of those expected. In this article  
30 we investigate complementary aspects of the amlodipine and captopril samples so to explain  
31 the previously observed low assays for these two drugs.

### 32 Design

33 Post-hoc analysis of the captopril and amlodipine drugs samples and their packages collected  
34 in the context of the SEVEN study.

### 35 Setting

36 10 countries were concerned: Benin, Burkina Faso, Congo, Democratic Republic of the Congo,  
37 Guinea, Côte d'Ivoire, Mauritania, Niger, Senegal and Togo.

### 38 Studied drug samples

39 305 amlodipine and 235 captopril drug samples collected during the SEVEN study along with  
40 their packaging were studied.

### 41 Outcome measures

1  
2  
3 42 The drug amount and the relative amounts of drug impurities as well as the main compounds  
4  
5 43 of the drugs packaging were analysed.  
6  
7  
8

## 9 44 Results

10  
11  
12 45 Identification of the blister packaging of the samples led to separate both amlodipine and  
13  
14 46 captopril drug samples in two groups. Mann Whitney's bilateral test showed a significant  
15  
16 47 difference ( $p < 0.0001$ ) between the median value of the captopril dosage when tablets are  
17  
18 48 packaged in blisters providing higher protection to humidity ( $n=105$ ) as opposed to the tablets  
19  
20 49 packaged in blisters providing lower humidity protection ( $n=130$ ).  
21  
22  
23  
24

## 25 26 50 Conclusion

27  
28  
29 51 Based on these results, particular attention should be paid to the materials and types of  
30  
31 52 packaging used in order to minimize the lack of control over the exposures and drug circuits  
32  
33 53 present in these different countries.  
34  
35  
36  
37  
38

## 39 54 Article summary : strengths and limitations of this study

- 40  
41  
42  
43 55 • Complementary investigation of results obtained during the Seven study, during which  
44  
45 56 1530 cardiovascular drug samples were prospectively collected in licensed and  
46  
47 57 unlicensed places of sale in Africa  
48  
49 58 • The specifically low amounts for two drugs, amlodipine and captopril, may be due to  
50  
51 59 degradation during storage and lack of drug protection of these sensitive drugs  
52  
53 60 • Degradation products and impurities quantities were above the recommended  
54  
55 61 thresholds in some amlodipine and captopril samples, raising potential concern about  
56  
57 62 the toxicity of the drugs  
58  
59  
60



- 63 • Packaging providing high protection from residual humidity could be a leverage to  
64 reduce the presence of degraded amlodipine and captopril drugs on the African soil
- 65 • Other studies should confirm, on these two sensitive drugs and other, that packaging  
66 providing better protection could be a mean to provide safer drugs in Africa

## 67 1. Introduction

68 Substandard drugs generally pose a serious health concern from several perspectives and this  
69 is particularly prevalent in developing countries where control regulations are poorly  
70 developed. Numerous cases of quality defects have been reported<sup>1,2</sup>, mostly in connection  
71 with anti-infective drugs<sup>3</sup>. However, since cardiovascular diseases are currently the most  
72 important non-communicable diseases in most low- and middle-income countries, it is critical  
73 to ensure that these diseases are addressed in a comprehensive manner<sup>4</sup>. Thus, under the  
74 initiative of X. Jouven, the study named SEVEN has been set up with the aim of evaluating the  
75 quality of the cardiovascular drugs present in ten African countries<sup>5-7</sup>, by exploring the case  
76 of 7 commonly used cardiac drugs, namely acenocoumarol, simvastatin, furosemide,  
77 hydrochlorothiazide, captopril, atenolol and amlodipine. It was showed that branded drugs  
78 were less likely to be of poor quality compared to generic or medicines with unknown version  
79 ( $p < 0.001$ ) ; conversely place of sale was not significantly associated with the proportion of  
80 poor quality ( $p = 0.29$ )<sup>6</sup>. Examination of the identity and assay of the active substances in the  
81 various samples collected revealed that among the products tested, only those based on  
82 amlodipine and captopril had very low active substance content that could be less than 75%  
83 of those expected<sup>6</sup>. The observation that the biggest quality defects were highlighted and

1  
2  
3 84 circumscribed around these two molecules motivated the team to search for additional  
4  
5 85 information in particular regarding their stability.  
6  
7  
8

9 86 For drugs where the quality defect is unintentional, according to Johnston et al, low dosage  
10  
11 87 levels of active substance may be the result of a variety of factors, including inadequate  
12  
13 88 package design or quality<sup>2</sup>. Yet, despite the fact that the influence of packaging changes on  
14  
15 89 the stability of medicinal products is now well established<sup>8,9</sup>, to the best of our knowledge,  
16  
17 90 the studies of the quality of real field samples have so far focused only on dosage units without  
18  
19 91 taking into account the type of packaging used or their chemical composition<sup>3</sup>. However, the  
20  
21 92 concept of packaging is equally important to assess, especially since the drug products need  
22  
23 93 to be kept stable in difficult climatic conditions, where, for example, residual moisture can  
24  
25 94 reach 88% in sub-Saharan Africa<sup>10</sup> and the ability of a plastic blister pack to protect a drug  
26  
27 95 from moisture is highly dependent on its design and composition<sup>11</sup>.  
28  
29  
30  
31  
32  
33

34 96 It is in this context that this study was taking place considering samples of captopril and  
35  
36 97 amlodipine products, collected as part of the SEVEN study<sup>5-7</sup>, as tracer products. On these  
37  
38 98 various samples was carried out the search for degradation products and/or chromatographic  
39  
40 99 related substances as well as the identification of the packaging actually present on the  
41  
42 100 products collected in several African countries, by trying, where possible and relevant, to  
43  
44 101 reconcile the different data and make them meaningful in relation to the potential causes of  
45  
46 102 underdosing previously highlighted for these two drugs.  
47  
48  
49  
50  
51  
52

## 53 103 2. Material and method

54  
55  
56  
57  
58  
59  
60

## 104 2.1. Sample collection

105 The methodology and design of the samples collection are described in detail in the articles  
106 published in the context of the SEVEN study<sup>5-7</sup>. A multidisciplinary collaborative team of  
107 epidemiologists, cardiologists and pharmacists from France and Africa conceived and  
108 designed the study. It was registered with the French national drug agency (Agence Nationale  
109 Sécurité du Médicament ID\_RCB:2014-A01275-42).

110 1530 drugs samples, including 235 captopril and 305 amlodipine drug samples, were collected  
111 as per the Guidelines for Field Surveys of the Quality of Medicines<sup>12</sup>. 10 countries were  
112 concerned: Benin, Burkina Faso, Congo, Democratic Republic of the Congo, Guinea, Côte  
113 d'Ivoire, Mauritania, Niger, Senegal and Togo. In these countries, samples were obtained from  
114 licensed (pharmacy) sources selected randomly and unlicensed (street market) places of sale  
115 chosen as per the local investigator's convenience. Drug samples were purchased in the  
116 capital city and when possible in one city located close to the country's border. Medicines  
117 were obtained by the study investigator's staff who posed as customers. The pharmacies were  
118 randomly chosen from a list provided by the Council of the Order of Pharmacists of each  
119 country. Unlicensed markets were identified based on the local investigator's knowledge. For  
120 each drug sample, investigators were asked to collect generic versions and brand name  
121 versions of the drug if available. After purchase, all drugs were stored at ambient temperature,  
122 in a dry place avoiding direct sunlight. Samples were sent via courier to the coordinating centre  
123 in France.

## 124 2.2. Reagents and sample preparation

125 Amlodipine besylate, captopril, iodine, sodium thiosulfate and triethylamine (>99% pure)  
126 were purchased from Sigma Aldrich (St. Quentin Fallavier, France). Analytical grade  
127 acetonitrile and methanol came from VWR Prolabo®Chemicals (Fontenay-sous-Bois, France).  
128 Ultrapure water was produced by the Q-Pod Milli-Q® system (Millipore, Molsheim, France).  
129 The stationary phase consisted of a Kinetex®(Phenomenex, Torrance, U.S.A.) C18 column (4.6  
130 mmx250 mm, i.d., 5 µm).  
131 Standard solutions were prepared as per the recommendations provided in the United States  
132 Pharmacopeia (USP) monograph of amlodipine besylate and captopril tablets. Captopril  
133 disulfide was obtained by using the protocol proposed in the European Pharmacopeia (Ph.  
134 Eur.) monograph of captopril.

## 135 2.3 Analytical conditions

136 Chemical analyses of samples were achieved by the Department of Laboratories in Paris  
137 (AGEPS, AP-HP). Chromatographic analyses were performed using a Dionex Ultimate 3000  
138 system (DIONEX, Ulis, France) coupled to a diode array detector. Chromatographic conditions  
139 as well as suitability tests were performed as per the recommendations provided in the  
140 monograph of amlodipine tablet (USP) and captopril (Ph. Eur.).

141 Identification of blisters was achieved using Fourier Transformed Infrared Spectroscopy (FTIR)  
142 FTIR Perkin-Elmer Spectrum 2000® spectrometer (Villebon-sur-Yvette, France) with a diamond  
143 crystal. Resolution, scan range and number of accumulated scans per spectrum were set to

1  
2  
3 144 0.5 cm<sup>-1</sup>, 4000 to 400 cm<sup>-1</sup> and 3, respectively. Spectrum were acquired on each side of the  
4  
5 145 blisters using attenuated total reflectance mode.  
6  
7  
8

## 9 146 2.4. Statistical analysis

10  
11  
12  
13 147 All statistical tests were performed using GraphPad Prism version 8.3.1. for Windows  
14  
15 148 (GraphPad Software, La Jolla California, USA). Nonparametric Spearman's correlation  
16  
17 149 coefficient (r) was calculated to measure the strength of the association between the peak  
18  
19 150 surface area of captopril and that of captopril disulfide. Mann-Whitney tests were used to  
20  
21 151 compare the median between drugs with lower and those with higher protection from  
22  
23 152 humidity packaging blisters.  
24  
25  
26  
27  
28

## 29 153 3. Results and discussion

### 30 154 3.1. Collected drug samples

31  
32  
33  
34 155 A total of 305 amlodipine and 235 captopril drug samples were collected in the ten countries.  
35  
36  
37 156 The amount of drug samples collected as a function of the countries and their place of  
38  
39 157 purchase is summarized in Table 1. Overall, 150 of the 305 amlodipine and 140 of the 235  
40  
41 158 captopril drug samples considered in the study were obtained from licensed places of sale  
42  
43 159 (Table 1). 265 and 195 drug samples were respectively identified as amlodipine and captopril  
44  
45 160 generic drugs.  
46  
47  
48 161 Table 1: number of collected amlodipine and captopril drug samples as a function of country  
49  
50 162 and place of purchase (i.e. licensed or unlicensed). DRC: Democratic Republic of the Congo;  
51  
52 163 NA : not applicable.  
53  
54  
55  
56  
57  
58  
59  
60

---

Amlodipine

---

Captopril

|                       | Licensed | Unlicensed | Total | Licensed | Unlicensed | Total |
|-----------------------|----------|------------|-------|----------|------------|-------|
| Benin                 | 20       | 30         | 50    | 20       | 30         | 50    |
| Burkina Faso          | 10       | NA         | 10    | 20       | NA         | 20    |
| Congo-<br>Brassaville | NA       | 30         | 30    | 10       | 10         | 20    |
| Côte d'Ivoire         | 30       | 45         | 75    | 30       | 15         | 45    |
| DRC                   | 20       | NA         | 20    | 10       | NA         | 10    |
| Guinea                | NA       | 10         | 10    | NA       | 10         | 10    |
| Mauritania            | 20       | 20         | 40    | 30       | NA         | 30    |
| Niger                 | 30       | NA         | 30    | NA       | 10         | 10    |
| Senegal               | NA       | 20         | 20    | NA       | 20         | 20    |
| Togo                  | 20       | NA         | 20    | 20       | NA         | 20    |
| Total                 | 150      | 155        | 305   | 140      | 95         | 235   |

164

## 165 3.2. Chromatographic purity profiles of the drugs

### 166 3.2.1. Captopril samples

167 The qualitative study of the chromatograms of the 235 captopril drug samples showed that  
 168 the 31 samples with drug amounts inferior to 90% (w/w%) contained the same impurity (Fig.  
 169 1). The detected impurity was assigned to captopril disulfide as it had the same retention time  
 170 than this compound.

171 Fig. 1: typical chromatographic profiles of captopril solutions: reference active substance  
 172 standard solution (black), typical substandard drug sample (blue).

173 Further, for every chromatogram, the sum of the surface of the peak areas corresponding to  
 174 captopril and that of captopril disulfide led to obtain areas recoveries between 90 and 110%  
 175 compared to that of the captopril reference solution. Therefore, one could infer that the lack  
 176 of drug captopril may be linked to the presence of captopril disulfide. As a result, a correlation

1  
2  
3 177 study between the surface of the peak of captopril and that of captopril disulfide impurity was  
4  
5 178 carried out and yielded a negative Spearman coefficient with a value of -0.613 ( $p=0.0069$ ).  
6  
7  
8

### 9 179 3.2.2. Amlodipine samples

10  
11 180 Unlike captopril, the 305 chromatographic profiles obtained for amlodipine samples strongly  
12  
13 181 differed from one to the other, implying that the drugs did not contain the same impurities  
14  
15 182 (Fig. 2). Indeed, under the analytical conditions recommended in the USP monograph, two  
16  
17 183 categories of chromatographic profiles were obtained as a function of the studied samples.  
18  
19

20  
21  
22 184 A first category of chromatographic profiles consisted of samples containing an impurity with  
23  
24 185 a relative retention time of about 0.5 (Fig 2. a) as compared to amlodipine, referred in the USP  
25  
26 186 as amlodipine related compound A. In 10 chromatograms, the surface of the peak of this  
27  
28 187 impurity exceeded the USP acceptance criteria for this impurity ( $<1.0\%$ , w/w).  
29  
30

31  
32  
33 188 The second category of chromatographic profiles comprised a peak with a relative retention  
34  
35 189 time of about 0.8 (Fig 2.b) corresponding to a degradation related impurity, namely an  
36  
37 190 amlodipine-lactose interaction product. For 30 sample solutions, the area of the peak of this  
38  
39 191 impurity compared to that of amlodipine exceeded the USP acceptance criteria for this  
40  
41 192 impurity ( $<0.5\%$  w/w).  
42  
43  
44  
45  
46

47 193 Fig. 2: typical chromatographic profiles for samples containing impurity A (a) and samples  
48  
49 194 containing amlodipine-lactose interaction product (b).  
50  
51

### 52 195 3.3. Blisters identification

53  
54  
55  
56 196 The identity and aspect of the blisters materials strongly differed between amlodipine and  
57  
58 197 captopril and within drug samples of the same drug.  
59  
60

1  
2  
3 198 FTIR analysis were performed on each side of the plastic blisters in order to identify its main  
4  
5  
6 199 compounds. Based on the analysis, two groups could be established: those with a spectrum  
7  
8 200 corresponding to polyvinyl-chloride's one (PVC, red and blue spectrum, Fig. 3) and those which  
9  
10 201 have two spectral bands (597 and 527  $\text{cm}^{-1}$ ) characteristic of the polyvinylidene-chloride  
11  
12  
13 202 presence<sup>13</sup> (PVDC, green spectrum, Fig. 3).

14  
15  
16 203 Fig. 3: typical FTIR spectrum of a polyvinyl-chloride (PVC) polymer packaging with (green  
17  
18  
19 204 spectrum) and without (blue and red spectrum) polyvinylidene-chloride (PVDC).

20  
21  
22  
23 205 The analysis highlighted that 105 out of the 235 captopril drug samples were packaged in  
24  
25 206 blisters containing PVDC and 130 in blisters only composed of PVC. In the case of amlodipine,  
26  
27  
28 207 none of the plastic blisters used to package the 245 amlodipine samples contained PVDC  
29  
30 208 (Table 2). 60 amlodipine samples were packaged in blisters consisting of foil-foil sealed  
31  
32  
33 209 aluminium (Table 2).

34  
35  
36 210 Table 2: number of amlodipine and captopril drug samples as a function of blister identity.

37  
38 211 PVC: polyvinyl-chloride; PVDC: polyvinylidene-chloride.  
39  
40  
41

| Blister identity | Amlodipine | Captopril |
|------------------|------------|-----------|
| PVC only         | 245        | 130       |
| Aluminium only   | 60         | None      |
| PVC-PVDC         | None       | 105       |

42  
43  
44  
45  
46  
47  
48  
49  
50  
51  
52 212  
53  
54  
55  
56  
57  
58  
59  
60



### 213 3.4. Drugs assays as a function of blister identifications

214 From the results obtained in 3.2., captopril assays results were separated based on the  
215 presence of PVDC or not (PVC only). Amlodipine assay results were divided in two groups: the  
216 group of samples packaged in foil-foil sealed aluminium blisters and the one packaged in PVC  
217 blisters (PVC only). The results are provided in figure 4.

218 Fig.4: medians of drug assays with interquartile ranges as a function of the drug and the blister  
219 composition. PVC: polyvinyl-chloride; PVDC: polyvinylidene-chloride; ns: non statistically  
220 significant; \*\*\*\*:  $p < 0.0001$ .

221 For amlodipine, no statistical difference in dosage ( $p = 0.7684$ ) was observed between the  
222 group with foil-foil aluminium packaging (median=96.10,  $n = 60$ ) and the group with PVC blister  
223 packaging (median=96.60,  $n = 245$ ).

224 For captopril, on the other hand, a statistical difference ( $p < 0.0001$ ) was found between the  
225 group of samples stored in blisters containing only PVC (median=96.60,  $n = 130$ ) and those  
226 stored in blisters containing PVC/PVDC (median=100.0,  $n = 105$ ).

## 227 4. Discussion

228 Sub-standard cardiac medicines represent a serious health hazard and result in significant  
229 morbidity and mortality<sup>4</sup>. The SEVEN study was the first major study of cardiovascular drugs  
230 in Sub-Saharan Africa<sup>5-7</sup>. The analysis of samples collected in Africa and through various sales  
231 spots of all kinds showed that among the products used in cardiovascular diseases, about 15-  
232 20% were of low quality, and the prevalence of poor quality is higher for the products  
233 containing amlodipine and captopril. Given this observation and the fact that these two active

1  
2  
3 234 substances are particularly sensitive to humidity and heat, the question arose as to whether  
4  
5 235 the intrinsic stability of the latter had contributed more to the quality defects highlighted at  
6  
7  
8 236 the time. So, in this follow-up study, we have sought to provide some answers to this question  
9  
10 237 by focusing on the search of associated degradation products and the nature of the packaging  
11  
12  
13 238 used at the time of the on-site collections.

14  
15  
16 239 We therefore sought to supplement the assay results with chromatographic purity studies on  
17  
18 240 samples of the various cardiological drugs samples collected during the SEVEN study. We  
19  
20 241 noted that the levels of impurities are particularly high for captopril and amlodipine samples  
21  
22 242 (>0.5% compared to the considered active substance), as is their high prevalence of  
23  
24 243 underdosing relative to other products, as previously mentioned. Of course, this problem  
25  
26 244 could have been caused by the use of poor-quality active ingredient. But the fact that it is  
27  
28 245 specific to these two active substances did not allow us to limit to this aspect alone. We  
29  
30 246 therefore also turned our attention to the stability issue and to what goes hand in hand with  
31  
32 247 this aspect. The identification of chromatographic impurities present concomitantly with the  
33  
34 248 active substance was carried out to support our hypotheses related to the degradation of  
35  
36 249 these compounds.

37  
38  
39  
40  
41  
42  
43  
44 250 In the case of the captopril drug samples, the compound detected (Fig. 1) in addition to  
45  
46 251 captopril was identified as captopril disulfide, a well-known degradation product of captopril  
47  
48 252 that is prompt to be formed under moisture and heat<sup>14</sup>. In other words, this would mean that  
49  
50 253 the underdoses initially observed in the captopril products<sup>6</sup> could be attributed to the poor  
51  
52 254 quality of the active substance used and/or, to a larger extent, to degradation occurring either  
53  
54 255 during manufacture and/or during improper storage. However, as it is well depicted that  
55  
56 256 captopril is far more susceptible to degradation in the presence of some excipients than alone  
57  
58  
59  
60

1  
2  
3 257 <sup>15,16</sup>, one can fathom that the presence of captopril disulfide may more likely result from  
4  
5 258 degradation due to uncontrolled exposure. As for amlodipine, chromatographic analyses  
6  
7  
8 259 showed in 30 samples the presence of an impurity due to amlodipine-lactose interaction (Fig.  
9  
10 260 2 b). Such interaction was shown to occur in time and mostly under high humidity conditions<sup>17</sup>,  
11  
12 261 which could, to some extent, explain the poor assays observed in SEVEN study<sup>7</sup>.

13  
14  
15  
16 262 These results are consistent with data in the literature in that the moisture vapour  
17  
18 263 transmission rate<sup>18</sup> (MVTR) must be controlled as it is critical to the stability of captopril<sup>14</sup> and  
19  
20 264 amlodipine<sup>19</sup>. The corollary is that we have indeed shown, in the case of captopril, a significant  
21  
22 265 difference ( $p < 0.0001$ , Fig. 4) in active substance content between tablets extracted from PVC  
23  
24 266 blisters and those from PVC-PVDC blisters that exhibit lower MVTR<sup>18</sup>. The results for  
25  
26 267 amlodipine are not statistically conclusive, but somehow the trend is noticeable since samples  
27  
28 268 with a peak area of the amlodipine-lactose interaction product greater than 0.5% (w/w) were  
29  
30 269 exclusively from the blisters with higher MVTR i.e. the blisters composed of PVC as opposed  
31  
32 270 to the foil-foil aluminium ones<sup>18</sup>. Accordingly, it can be seen that the use of low moisture  
33  
34 271 barrier packaging for these two products among the different cardiac drugs tested appears to  
35  
36 272 have contributed to their low assay values.

37  
38  
39  
40  
41  
42  
43  
44 273 This poor quality, represented by both a lower active substance content and the presence of  
45  
46 274 degradation products, subjects the patient to safety risks. On the one hand, any dose lower  
47  
48 275 than the dose to which the body has developed tolerance may induce an effect that is difficult  
49  
50 276 to predict and may even be contrary to the action of the usual dose<sup>20</sup>. On the other hand, the  
51  
52 277 degradation products formed may be toxic<sup>21</sup>.

1  
2  
3 278 Captopril disulphide is a well-known metabolite of captopril, which can reversibly interconvert  
4  
5 279 into captopril in the blood<sup>22</sup>. However, in human pharmacokinetic studies the amount of  
6  
7  
8 280 captopril disulphide in the blood never exceeds 8% of that of captopril<sup>22,23</sup>. Therefore, clinical  
9  
10 281 consequences of exposure to higher amounts of captopril disulfide are unknown. This is to be  
11  
12  
13 282 considered because the disulfide metabolites of sulfur-based drugs were 50 to 100 times more  
14  
15 283 toxic on hepatocytes from isolated rats than the parent drugs<sup>24</sup>.

16  
17  
18  
19 284 In some amlodipine samples, two main degradation products were detected as mentioned  
20  
21 285 earlier, amlodipine impurity A that corresponds to the oxidation of its dihydropyridine ring  
22  
23  
24 286 and the amlodipine-lactose interaction product. Impurity A has been reported to be among  
25  
26 287 the most found metabolites in urines (7%)<sup>25</sup>. As its level was always inferior to 2% relative to  
27  
28  
29 288 the active substance in the samples analysed, one can assume that this presence may have a  
30  
31 289 limited impact to the patients. As for the amlodipine-lactose interaction product, no data are  
32  
33  
34 290 currently available on its fate in the body and its toxicity, which makes it a risk to consider.

35  
36  
37 291 Overall, on the basis of these additional results from the study of the chromatographic profiles  
38  
39 292 of the collected samples, significant quantities of cardio drugs sold on African soil may not  
40  
41  
42 293 only present a lack of efficacy but also safety issues, due to the presence of impurities and/or  
43  
44 294 degradation products resulting from poor storage and packaging conditions.

#### 48 295 4.1. Limitations of the study

49  
50  
51  
52 296 This study is of an observational type and even if as much information as possible has been  
53  
54 297 collected for the research and attribution of causes likely to be at the origin of the active  
55  
56  
57 298 substance dosage defect, other factors than those related to packaging and storage problems  
58  
59  
60

1  
2  
3 299 may be involved. The lack of active substance is most likely multi-factorial and it may be useful  
4  
5  
6 300 to explore with more samples when applicable.  
7  
8  
9

## 10 301 Conclusion

11  
12 302 Further studies of captopril and amlodipine samples from Africa showed that their low assays  
13  
14 303 would result in part from the degradation of the active substance, which may indicate that  
15  
16  
17 304 protective measures to avoid degradation of the drug products were not commensurate with  
18  
19 305 their unstable behaviour, particularly in the presence of moisture and heat. FTIR analyses of  
20  
21  
22 306 the samples' blisters disclosed they differ in material composition for a same active substance.  
23  
24 307 In the case of captopril, statistical analysis has shown that the active substance content of  
25  
26  
27 308 products in tighter blister packs is higher than that of products in less moisture-resistant  
28  
29 309 packaging. In the case of amlodipine, only the samples with low moisture resistant packaging  
30  
31  
32 310 had high amounts (>0.5% w/w) of degradation products.  
33  
34

35 311 Using packaging with elevated moisture barrier properties could be a significant leverage to  
36  
37 312 reduce the prevalence of substandard drugs in countries where medicines circuit and storage  
38  
39  
40 313 are poorly controlled. It is therefore also important to make the health authorities in these  
41  
42 314 countries aware that the quality of packaging must also be taken into account when evaluating  
43  
44  
45 315 medicines supplied.  
46  
47  
48

## 49 316 Figure legend/caption

50  
51 317 Table 1: number of collected amlodipine and captopril drug samples as a function of country  
52  
53  
54 318 and place of purchase (i.e. licensed or unlicensed). DRC: Democratic Republic of the Congo;  
55  
56 319 NA : not applicable.  
57  
58  
59  
60

320 Table 2: number of amlodipine and captopril drug samples as a function of blister identity.

321 PVC: polyvinyl-chloride; PVDC: polyvinylidene-chloride.

322 Fig. 1: typical chromatographic profiles of captopril solutions: reference active substance  
323 standard solution (black), typical substandard drug sample (blue).

324 Fig. 2: typical chromatographic profiles for samples containing impurity A (a) and samples  
325 containing amlodipine-lactose interaction product (b).

326 Fig. 3: typical FTIR spectrum of a polyvinyl-chloride (PVC) polymer packaging with (green  
327 spectrum) and without (blue and red spectrum) polyvinylidene-chloride (PVDC).

328 Fig. 4: medians of drug assays with interquartile ranges as a function of the drug and the blister  
329 composition. PVC: polyvinyl-chloride; PVDC: polyvinylidene-chloride; ns: non statistically  
330 significant; \*\*\*\*:  $p < 0.0001$ .

## 331 Footnotes

### 332 Contributors

333 All authors have substantial contributions.

334 Study concept and design: PH. Secretan, B. Do, M. Antignac and X. Jouven

335 Responsible of samples collection: S. Ikama Meo, R. N' Guetta, D. Balde, A. Sidy Ali, P.  
336 Zabsonre, JL. Takombe.

337 Chemical analysis: M. Bernard, B. Do, PH Secretan and Najet Yagoubi.

338 Interpretation of data: all authors.

339 Statistical analysis: PH. Secretan, B. Do, MC Perier, M. Antignac and X. Jouven.

340 Drafting of the manuscript: all authors.

341 Final approval of the version to be published: all authors.

### 342 Funding

343 The SEVEN study was exclusively supported by a public grant:

344 - ANSM (Agence Nationale Sécurité du Médicament) (Grant AAP-2014-042).

345 - INSERM (Institut national de la Santé et de la Recherche Médicale),

1  
2  
3 346 - AP-HP (Assistance Publique – Hôpitaux de Paris), Paris Descartes University  
4

5 347 **Competing interests**  
6

7 348 None.  
8  
9

10 349 **Patient consent for publication**  
11

12 350 No patient involved (Not required).  
13  
14

15 351 **Data sharing statement**  
16

17 352 No additional data available.  
18  
19  
20  
21  
22  
23  
24  
25  
26  
27  
28  
29  
30  
31  
32  
33  
34  
35  
36  
37  
38  
39  
40  
41  
42  
43  
44  
45  
46  
47  
48  
49  
50  
51  
52  
53  
54  
55  
56  
57  
58  
59  
60

## References

- 1  
2  
3  
4 353  
5  
6 354 1. Nayyar, G. M. L. *et al.* Falsified and Substandard Drugs: Stopping the Pandemic. *Am. J.*  
7  
8 355 *Trop. Med. Hyg.* **100**, 1058–1065 (2019).
- 10  
11 356 2. Johnston, A. & Holt, D. W. Substandard drugs: a potential crisis for public health:  
12  
13 357 Substandard drugs. *Br. J. Clin. Pharmacol.* **78**, 218–243 (2014).
- 15  
16 358 3. Almuzaini, T., Choonara, I. & Sammons, H. Substandard and counterfeit medicines: a  
17  
18 359 systematic review of the literature. *BMJ Open* **3**, e002923 (2013).
- 20  
21 360 4. Bowry, A. D. K., Lewey, J., Dugani, S. B. & Choudhry, N. K. The Burden of Cardiovascular  
22  
23 361 Disease in Low- and Middle-Income Countries: Epidemiology and Management. *Can. J.*  
24  
25 362 *Cardiol.* **31**, 1151–1159 (2015).
- 27  
28 363 5. Antignac, M. *et al.* Quality Assessment of 7 Cardiovascular Drugs in 10 Sub-Saharan  
29  
30 364 Countries: The SEVEN Study. *JAMA Cardiol.* **2**, 223 (2017).
- 32  
33 365 6. Antignac, M. *et al.* Fighting fake medicines: First quality evaluation of cardiac drugs in  
34  
35 366 Africa. *Int. J. Cardiol.* **243**, 523–528 (2017).
- 37  
38 367 7. Macquart de Terline, D. *et al.* Substandard drugs among five common antihypertensive  
39  
40 368 generic medications: an analysis from 10 African countries. *J. Hypertens.* **36**, 395–401  
41  
42 369 (2018).
- 44  
45 370 8. Khan, M. H. *et al.* Effects of packaging and storage conditions on the quality of amoxicillin-  
46  
47 371 clavulanic acid – an analysis of Cambodian samples. *BMC Pharmacol. Toxicol.* **14**, 33  
48  
49 372 (2013).
- 51  
52 373 9. Asafu-Adjaye, E. B. *et al.* Comparative stability study of unit-dose repackaged furosemide  
53  
54 374 tablets. *Clin. Res. Regul. Aff.* **28**, 38–48 (2011).
- 56  
57  
58  
59  
60



- 1  
2  
3 375 10. Ogbonna, A. C. & Harris, D. J. Thermal comfort in sub-Saharan Africa: Field study report in  
4  
5 376 Jos-Nigeria. *Appl. Energy* **85**, 1–11 (2008).  
6  
7  
8 377 11. Scrivens, G. *et al.* The Humidity Exposure of Packaged Products. in *Accelerated Predictive*  
9  
10 378 *Stability* 105–146 (Elsevier, 2018). doi:10.1016/B978-0-12-802786-8.00005-X.  
11  
12  
13 379 12. Newton, P. N. *et al.* Guidelines for Field Surveys of the Quality of Medicines: A Proposal.  
14  
15 380 *PLOS Med.* **6**, e1000052 (2009).  
16  
17  
18 381 13. Bower, D. I. & Maddams, W. F. *The Vibrational Spectroscopy of Polymers.* (Cambridge  
19  
20 382 University Press, 1989). doi:10.1017/CBO9780511623189.  
21  
22  
23 383 14. França, L. de M. *et al.* NIR hyperspectral imaging to evaluate degradation in captopril  
24  
25 384 commercial tablets. *Eur. J. Pharm. Biopharm.* **104**, 180–188 (2016).  
26  
27  
28 385 15. Tôrres, A. R., Grangeiro, S. & Fragoso, W. D. Multivariate control charts for monitoring  
29  
30 386 captopril stability. *Microchem. J.* **118**, 259–265 (2015).  
31  
32  
33 387 16. Stulzer, H. K., Rodrigues, P. O., Cardoso, T. M., Matos, J. S. R. & Silva, M. A. S. Compatibility  
34  
35 388 studies between captopril and pharmaceutical excipients used in tablets formulations. *J.*  
36  
37 389 *Therm. Anal. Calorim.* **91**, 323–328 (2008).  
38  
39  
40 390 17. Abdoh, A., Al-Omari, M. M., Badwan, A. A. & Jaber, A. M. Y. Amlodipine Besylate–  
41  
42 391 Excipients Interaction in Solid Dosage Form. *Pharm. Dev. Technol.* **9**, 15–24 (2004).  
43  
44  
45 392 18. Waterman, K. C. & Macdonald, B. C. Package Selection for Moisture Protection for Solid,  
46  
47 393 Oral Drug Products. *J. Pharm. Sci.* **99**, 4437–4452 (2010).  
48  
49  
50 394 19. Malcolm, L. Accelerated Stability Assessment Program (ASAP) Applications in a  
51  
52 395 Postapproval Environment. in *Accelerated Predictive Stability* 287–304 (Elsevier, 2018).  
53  
54  
55 396 doi:10.1016/B978-0-12-802786-8.00012-7.  
56  
57  
58  
59  
60

- 1  
2  
3 397 20. Peper, A. Aspects of the Relationship between Drug Dose and Drug Effect. *Dose-Response*  
4  
5 398 7, dose-response.0 (2009).  
6  
7  
8 399 21. Melo, S. R. d. O., Homem-de-Mello, M., Silveira, D. & Simeoni, L. A. Advice on Degradation  
9  
10 400 Products in Pharmaceuticals: A Toxicological Evaluation. *PDA J. Pharm. Sci. Technol.* **68**,  
11  
12 401 221–238 (2014).  
13  
14  
15  
16 402 22. Migdalof, B. H. *et al.* Captopril: Pharmacology, Metabolism, and Disposition. *Drug Metab.*  
17  
18 403 *Rev.* **15**, 841–869 (1984).  
19  
20  
21 404 23. Duchin, K. L., McKinstry, D. N., Cohen, A. I. & Migdalof, B. H. Pharmacokinetics of Captopril  
22  
23 405 in Healthy Subjects and in Patients with Cardiovascular Diseases: *Clin. Pharmacokinet.* **14**,  
24  
25 406 241–259 (1988).  
26  
27  
28  
29 407 24. Jatoe, S. D., Lauriault, V., McGirr, L. G. & O'Brien, P. J. THE TOXICITY OF DISULPHIDES TO  
30  
31 408 ISOLATED HEPATOCYTES AND MITOCHONDRIA. *Drug Metabol. Drug Interact.* **6**, (1988).  
32  
33  
34  
35 409 25. Stopher, D. A., Beresford, A. P., Macrae, P. V. & Humphrey, M. J. The Metabolism and  
36  
37 410 Pharmacokinetics of Amlodipine in Humans and Animals: *J. Cardiovasc. Pharmacol.* **12**,  
38  
39 411 S55–S59 (1988).  
40  
41  
42  
43 412

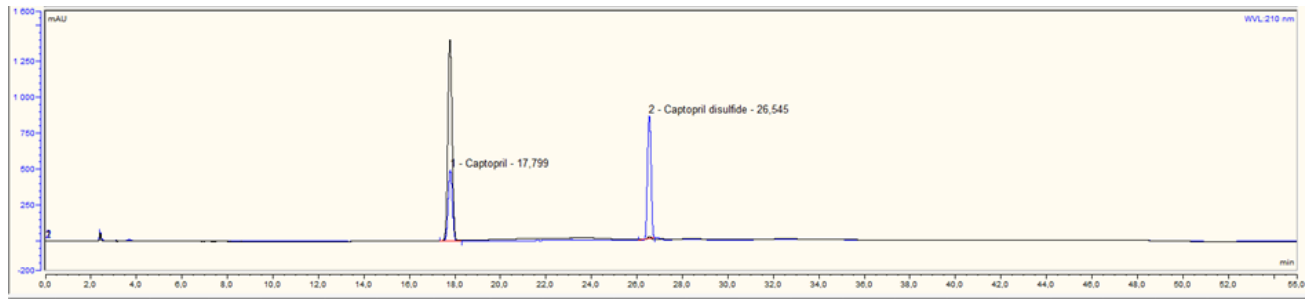

Fig. 1: typical chromatographic profiles of captopril solutions: reference active substance standard solution (black), typical substandard drug sample (blue).



Fig. 2 : typical chromatographic profiles for samples containing impurity A (a) and samples containing amlodipine-lactose interaction product (b)

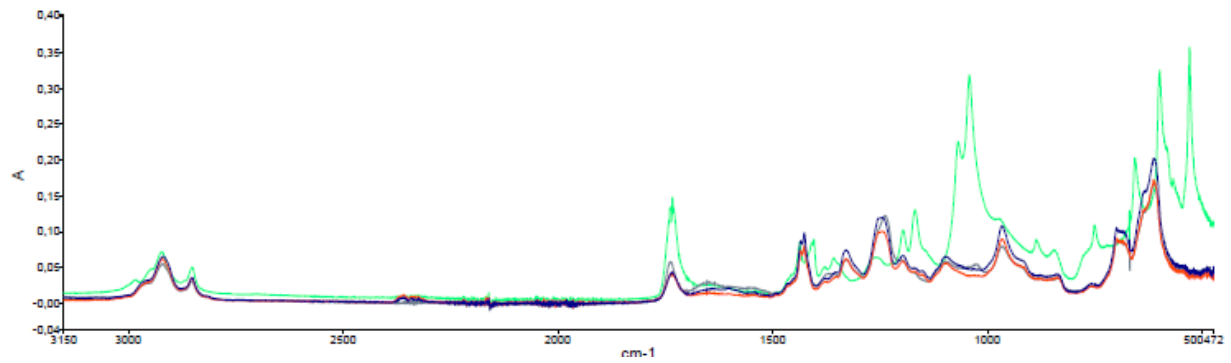

Fig. 3 : typical FTIR spectrum of a polyvinyl-chloride (PVC) polymer packaging with (green spectrum) and without (blue and red spectrum) polyvinylidene-chloride (PVDC).

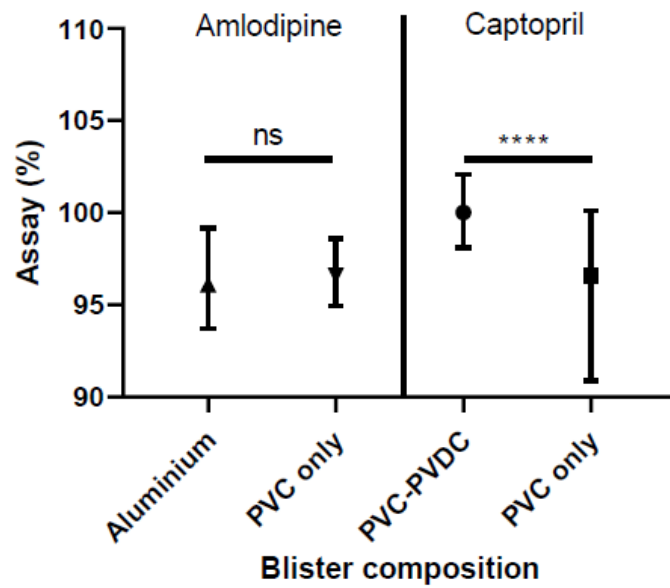

Fig.4: medians of drug assays with interquartile ranges as a function of the drug and the blister composition. PVC: polyvinyl-chloride; PVDC: polyvinylidene-chloride; ns: non statistically significant; \*\*\*\*:  $p < 0.0001$ .

# BMJ Open

## A post hoc study to investigate the potential causes of poor quality of cardiovascular medicines collected in sub-Saharan countries

|                                 |                                                                                                                                                                                                                                                                                                                                                                                                                                                                                                                                                                                                                                                                                                                                                                                                                                                                                                                                                                                                                                                                                                                                                                                                                                                                                                                                                                                                                                                                                                                                                                                                                                                                                                                                     |
|---------------------------------|-------------------------------------------------------------------------------------------------------------------------------------------------------------------------------------------------------------------------------------------------------------------------------------------------------------------------------------------------------------------------------------------------------------------------------------------------------------------------------------------------------------------------------------------------------------------------------------------------------------------------------------------------------------------------------------------------------------------------------------------------------------------------------------------------------------------------------------------------------------------------------------------------------------------------------------------------------------------------------------------------------------------------------------------------------------------------------------------------------------------------------------------------------------------------------------------------------------------------------------------------------------------------------------------------------------------------------------------------------------------------------------------------------------------------------------------------------------------------------------------------------------------------------------------------------------------------------------------------------------------------------------------------------------------------------------------------------------------------------------|
| Journal:                        | <i>BMJ Open</i>                                                                                                                                                                                                                                                                                                                                                                                                                                                                                                                                                                                                                                                                                                                                                                                                                                                                                                                                                                                                                                                                                                                                                                                                                                                                                                                                                                                                                                                                                                                                                                                                                                                                                                                     |
| Manuscript ID                   | bmjopen-2020-039252.R2                                                                                                                                                                                                                                                                                                                                                                                                                                                                                                                                                                                                                                                                                                                                                                                                                                                                                                                                                                                                                                                                                                                                                                                                                                                                                                                                                                                                                                                                                                                                                                                                                                                                                                              |
| Article Type:                   | Original research                                                                                                                                                                                                                                                                                                                                                                                                                                                                                                                                                                                                                                                                                                                                                                                                                                                                                                                                                                                                                                                                                                                                                                                                                                                                                                                                                                                                                                                                                                                                                                                                                                                                                                                   |
| Date Submitted by the Author:   | 05-Oct-2020                                                                                                                                                                                                                                                                                                                                                                                                                                                                                                                                                                                                                                                                                                                                                                                                                                                                                                                                                                                                                                                                                                                                                                                                                                                                                                                                                                                                                                                                                                                                                                                                                                                                                                                         |
| Complete List of Authors:       | Secretan, Philippe-Henri; INSERM U970, Paris Centre de Recherche Cardiovasculaire (PARCC), Université de Paris, Paris, France<br>Antignac, Marie; INSERM U970, Paris Centre de Recherche Cardiovasculaire (PARCC), Université de Paris, Paris, France; Hospital Saint-Antoine, Department of pharmacy, Paris, France<br>YAGOUBI, Najet; Université Paris-Sud Faculté de Pharmacie, Laboratoire Matériaux et Santé, EA 401, Chatenay-Malabry, France<br>Bernard, Mélisande; AP-HP, Agence Générale des Equipements et Produits de Sante, department of laboratories, Paris, France<br>PERIER, Marie Cécile; INSERM U970, Paris Centre de Recherche Cardiovasculaire (PARCC), Université de Paris, Paris, France<br>TAKOMBE, Jean Laurent; Ngalemia Clinic, Kinshasa, The Democratic Republic of the Congo<br>BALDE, Dadhi ; Hospital Ignace Deen, Department of cardiology, Conakry, Guinea<br>N'GUETTA, Roland; University Hospital Center of Treichville, Institut de cardiologie d'Abidjan, Abidjan, Cote d'Ivoire<br>IKAMA, Méo Stéphane; University Hospital Center of Brazzaville, Departement of cardiology, Brazzaville, Congo<br>ZABSONRE, Patrice; Centre Hospitalier Universitaire Yalgado Ouédraogo, Department of cardiology, Ouagadougou, Burkina Faso<br>SIDI ALY, Abdallah; Cardiology Clinics, Nouakchott, Mauritania<br>JOUVEN, Xavier; INSERM U970, Paris Centre de Recherche Cardiovasculaire (PARCC), Université de Paris, Paris, France; Hopital Europeen Georges Pompidou, Department of cardiology, Paris, France<br>DO, Bernard; Université Paris-Sud Faculte de Pharmacie, Laboratoire Matériaux et Santé, EA 401, Chatenay-Malabry, France; Henri Mondor Hospital Department of Pharmacy, Creteil, France |
| <b>Primary Subject Heading</b>: | Global health                                                                                                                                                                                                                                                                                                                                                                                                                                                                                                                                                                                                                                                                                                                                                                                                                                                                                                                                                                                                                                                                                                                                                                                                                                                                                                                                                                                                                                                                                                                                                                                                                                                                                                                       |
| Secondary Subject Heading:      | Cardiovascular medicine, Public health                                                                                                                                                                                                                                                                                                                                                                                                                                                                                                                                                                                                                                                                                                                                                                                                                                                                                                                                                                                                                                                                                                                                                                                                                                                                                                                                                                                                                                                                                                                                                                                                                                                                                              |
| Keywords:                       | Quality in health care < HEALTH SERVICES ADMINISTRATION & MANAGEMENT, PUBLIC HEALTH, Toxicity < THERAPEUTICS, CARDIOLOGY                                                                                                                                                                                                                                                                                                                                                                                                                                                                                                                                                                                                                                                                                                                                                                                                                                                                                                                                                                                                                                                                                                                                                                                                                                                                                                                                                                                                                                                                                                                                                                                                            |
|                                 |                                                                                                                                                                                                                                                                                                                                                                                                                                                                                                                                                                                                                                                                                                                                                                                                                                                                                                                                                                                                                                                                                                                                                                                                                                                                                                                                                                                                                                                                                                                                                                                                                                                                                                                                     |

1  
2  
3  
4  
5  
6  
7  
8  
9  
10  
11  
12  
13  
14  
15  
16  
17  
18  
19  
20  
21  
22  
23  
24  
25  
26  
27  
28  
29  
30  
31  
32  
33  
34  
35  
36  
37  
38  
39  
40  
41  
42  
43  
44  
45  
46  
47  
48  
49  
50  
51  
52  
53  
54  
55  
56  
57  
58  
59  
60







I, the Submitting Author has the right to grant and does grant on behalf of all authors of the Work (as defined in the below author licence), an exclusive licence and/or a non-exclusive licence for contributions from authors who are: i) UK Crown employees; ii) where BMJ has agreed a CC-BY licence shall apply, and/or iii) in accordance with the terms applicable for US Federal Government officers or employees acting as part of their official duties; on a worldwide, perpetual, irrevocable, royalty-free basis to BMJ Publishing Group Ltd ("BMJ") its licensees and where the relevant Journal is co-owned by BMJ to the co-owners of the Journal, to publish the Work in this journal and any other BMJ products and to exploit all rights, as set out in our [licence](#).

The Submitting Author accepts and understands that any supply made under these terms is made by BMJ to the Submitting Author unless you are acting as an employee on behalf of your employer or a postgraduate student of an affiliated institution which is paying any applicable article publishing charge ("APC") for Open Access articles. Where the Submitting Author wishes to make the Work available on an Open Access basis (and intends to pay the relevant APC), the terms of reuse of such Open Access shall be governed by a Creative Commons licence – details of these licences and which [Creative Commons](#) licence will apply to this Work are set out in our licence referred to above.

Other than as permitted in any relevant BMJ Author's Self Archiving Policies, I confirm this Work has not been accepted for publication elsewhere, is not being considered for publication elsewhere and does not duplicate material already published. I confirm all authors consent to publication of this Work and authorise the granting of this licence.

1  
2  
3  
4  
5 1 A post hoc study to investigate the potential causes of poor  
6  
7  
8  
9 2 quality of cardiovascular medicines collected in sub-Saharan  
10  
11  
12  
13  
14 3 countries  
15  
16  
17

18 4 Philippe-Henri Secretan<sup>1</sup>, Marie Antignac<sup>1,2</sup>, Najet Yagoubi<sup>3</sup>, Melisande Bernard<sup>4</sup>, Marie-  
19 5 Cecile Perier<sup>1</sup>, Jean Laurent Takombe<sup>5</sup>, Dadhi Baldé<sup>6</sup>, Roland N'Guetta<sup>7</sup>, Méo Stéphane  
20 6 Ikama<sup>8</sup>, Patrice Zabsonre<sup>9</sup>, Abdallahi Sidi Aly<sup>10</sup>, Xavier Jouven<sup>1,11</sup> and Bernard Do<sup>3,12</sup>.

21  
22  
23 7 1 Paris Cardiovascular Research Centre, INSERM U970, Paris, France

24  
25 8 2 Department of Pharmacy, Saint-Antoine Hospital, HUEP, AP-HP, Paris, France

26  
27  
28 9 3 Faculty of Pharmacy, Paris-Sud University, UA 401 Matériaux et Santé, Chatenay-Malabry,  
29 10 France

30  
31  
32 11 4 Department of Laboratories, Agence Générale des Equipements et Produits de Sante, AP HP,  
33 12 Paris, France

34  
35  
36 13 5 Clinique Ngaliema, Kinshasa, Democratic Republic of Congo

37  
38 14 6 Department of Cardiology, Ignace Deen hospital, Conakry, Guinea

39  
40 15 7 Cardiology institute of Abidjan, Treichville hospital, Abidjan, Côte d'Ivoire

41  
42 16 8 Department of Cardiology, Brazzaville hospital, Brazzaville, Congo

43  
44 17 9 Yalgado Ouédraogo hospital, Ouagadougou, Burkina Faso

45  
46 18 10. Department of Cardiology, Nouakchott, Mauritanie

47  
48 19 11 Department of Cardiology, European Georges Pompidou Hospital, AP-HP, Paris, France

49  
50 20 12 Department of Pharmacy, Henri Mondor Hospital, AP-HP, Créteil, France

51  
52 21 Correspondence to Dr Philippe-Henri Secretan ; phsecretan@yahoo.fr

53  
54  
55  
56  
57  
58  
59 22

## 23 Abstract

### 24 Objectives

25 The incidence of cardiovascular diseases is increasing and there is a growing need to provide  
26 access to quality cardio drugs in Africa. In the SEVEN study, we analysed 1530 cardiovascular  
27 drug samples randomly collected from ten African countries. By that time, of the seven drugs  
28 products analysed, only those containing amlodipine and captopril had very low assay values  
29 with active substance contents that could be less than 75% of those expected. In this article  
30 we investigate complementary aspects of the amlodipine and captopril samples so to explain  
31 the previously observed low assays for these two drugs.

### 32 Design

33 Post-hoc analysis of the captopril and amlodipine drugs samples and their packages collected  
34 in the context of the SEVEN study.

### 35 Setting

36 10 countries were concerned: Benin, Burkina Faso, Congo, Democratic Republic of the Congo,  
37 Guinea, Côte d'Ivoire, Mauritania, Niger, Senegal and Togo.

### 38 Participants

39 Local scientists and hospital practitioners collected the drug samples in the 10 African  
40 countries.

### 41 Outcome measures

1  
2  
3 42 The drug amount and the relative amounts of drug impurities as well as the main compounds  
4  
5 43 of the drugs packaging were analysed.  
6  
7  
8

#### 9 44 Results

10  
11  
12 45 Identification of the blister packaging of the samples led to separate both amlodipine and  
13  
14 46 captopril drug samples in two groups. Mann Whitney's bilateral test showed a significant  
15  
16 47 difference ( $p < 0.0001$ ) between the median value of the captopril dosage when tablets are  
17  
18 48 packaged in blisters providing higher protection to humidity ( $n=105$ ) as opposed to the tablets  
19  
20 49 packaged in blisters providing lower humidity protection ( $n=130$ ).  
21  
22  
23  
24  
25

#### 26 50 Conclusion

27  
28  
29 51 Based on these results, particular attention should be paid to the materials and types of  
30  
31 52 packaging used in order to minimize the lack of control over the exposures and drug circuits  
32  
33 53 present in these different countries.  
34  
35  
36  
37  
38

### 39 54 Article summary : strengths and limitations of this study

- 40  
41  
42  
43 55 • Captopril and amlodipine-based drug samples were randomly collected in licensed and  
44  
45 56 unlicensed places of sale in Africa to be analysed  
46  
47  
48 57 • The countries involved in this study were Benin, Burkina Faso, Congo, Democratic  
49  
50 58 Republic of the Congo, Guinea, Côte d'Ivoire, Mauritania, Niger, Senegal and Togo  
51  
52  
53 59 • Assay and impurity profile were performed for quality and stability assessment  
54  
55 60 considering, where applicable, the type of primary packaging used  
56  
57  
58  
59  
60

## 61 1. Introduction

62 Substandard drugs generally pose a serious health concern from several perspectives and this  
63 is particularly prevalent in developing countries where control regulations are poorly  
64 developed. Numerous cases of quality defects have been reported<sup>1,2</sup>, mostly in connection  
65 with anti-infective drugs<sup>3</sup>. However, since cardiovascular diseases are currently the most  
66 important non-communicable diseases in most low- and middle-income countries, it is critical  
67 to ensure that these diseases are addressed in a comprehensive manner<sup>4</sup>. Thus, under the  
68 initiative of X. Jouven, the study named SEVEN has been set up with the aim of evaluating the  
69 quality of the cardiovascular drugs present in ten African countries<sup>5-7</sup>, by exploring the case  
70 of 7 commonly used cardiac drugs, namely acenocoumarol, simvastatin, furosemide,  
71 hydrochlorothiazide, captopril, atenolol and amlodipine. It was showed that branded drugs  
72 were less likely to be of poor quality compared to generic or medicines with unknown version  
73 ( $p < 0.001$ ) ; conversely place of sale was not significantly associated with the proportion of  
74 poor quality ( $p = 0.29$ )<sup>6</sup>. Examination of the identity and assay of the active substances in the  
75 various samples collected revealed that among the products tested, only those based on  
76 amlodipine and captopril had very low active substance content that could be less than 75%  
77 of those expected<sup>6</sup>. The observation that the biggest quality defects were highlighted and  
78 circumscribed around these two molecules motivated the team to search for additional  
79 information in particular regarding their stability.

80 For drugs where the quality defect is unintentional, according to Johnston et al, low dosage  
81 levels of active substance may be the result of a variety of factors, including inadequate  
82 package design or quality<sup>2</sup>. Yet, despite the fact that the influence of packaging changes on

1  
2  
3 83 the stability of medicinal products is now well established<sup>8,9</sup>, to the best of our knowledge,  
4  
5 84 the studies of the quality of real field samples have so far focused only on dosage units without  
6  
7  
8 85 taking into account the type of packaging used or their chemical composition<sup>3</sup>. However, the  
9  
10 86 concept of packaging is equally important to assess, especially since the drug products need  
11  
12  
13 87 to be kept stable in difficult climatic conditions, where, for example, residual moisture can  
14  
15 88 reach 88% in sub-Saharan Africa<sup>10</sup> and the ability of a plastic blister pack to protect a drug  
16  
17 89 from moisture is highly dependent on its design and composition<sup>11</sup>.

20  
21 90 It is in this context that this study was taking place considering samples of captopril and  
22  
23 91 amlodipine products, collected as part of the SEVEN study<sup>5-7</sup>, as tracer products. On these  
24  
25 92 various samples was carried out the search for degradation products and/or chromatographic  
26  
27 93 related substances as well as the identification of the packaging actually present on the  
28  
29 94 products collected in several African countries, by trying, where possible and relevant, to  
30  
31 95 reconcile the different data and make them meaningful in relation to the potential causes of  
32  
33 96 underdosing previously highlighted for these two drugs.  
34  
35  
36  
37  
38  
39

## 40 97 2. Material and method

### 45 98 2.1. Sample collection

46  
47  
48  
49 99 The methodology and design of the samples collection are described in detail in the articles  
50  
51 100 published in the context of the SEVEN study<sup>5-7</sup>. A multidisciplinary collaborative team of  
52  
53 101 epidemiologists, cardiologists and pharmacists from France and Africa conceived and  
54  
55 102 designed the study. It was registered with the French national drug agency (Agence Nationale  
56  
57 103 Sécurité du Médicament ID\_RCB:2014-A01275-42).  
58  
59  
60

1  
2  
3 104 1530 drugs samples, including 235 captopril and 305 amlodipine drug samples, were collected  
4  
5  
6 105 as per the Guidelines for Field Surveys of the Quality of Medicines<sup>12</sup>. 10 countries were  
7  
8 106 concerned: Benin, Burkina Faso, Congo, Democratic Republic of the Congo, Guinea, Côte  
9  
10 107 d'Ivoire, Mauritania, Niger, Senegal and Togo. In these countries, samples were obtained from  
11  
12 108 licensed (pharmacy) sources selected randomly and unlicensed (street market) places of sale  
13  
14  
15 109 chosen as per the local investigator's convenience. Drug samples were purchased in the  
16  
17  
18 110 capital city and when possible in one city located close to the country's border. Medicines  
19  
20 111 were obtained by the study investigator's staff who posed as customers. The pharmacies were  
21  
22 112 randomly chosen from a list provided by the Council of the Order of Pharmacists of each  
23  
24 113 country. Unlicensed markets were identified based on the local investigator's knowledge. For  
25  
26 114 each drug sample, investigators were asked to collect generic versions and brand name  
27  
28 115 versions of the drug if available. After purchase, all drugs were stored at ambient temperature,  
29  
30 116 in a dry place avoiding direct sunlight. Samples were sent via courier to the coordinating centre  
31  
32  
33  
34 117 in France.

## 38 39 118 2.2. Reagents and sample preparation

40  
41  
42 119 Amlodipine besylate, captopril, iodine, sodium thiosulfate and triethylamine (>99% pure)  
43  
44 120 were purchased from Sigma Aldrich (St. Quentin Fallavier, France). Analytical grade  
45  
46 121 acetonitrile and methanol came from VWR Prolabo®Chemicals (Fontenay-sous-Bois, France).  
47  
48 122 Ultrapure water was produced by the Q-Pod Milli-Q® system (Millipore, Molsheim, France).  
49  
50 123 The stationary phase consisted of a Kinetex®(Phenomenex, Torrance, U.S.A.) C18 column (4.6  
51  
52 124 mmx250 mm, i.d., 5 µm).

1  
2  
3 125 Standard solutions were prepared as per the recommendations provided in the United States  
4  
5 126 Pharmacopeia (USP) monograph of amlodipine besylate and captopril tablets. Captopril  
6  
7  
8 127 disulfide was obtained by using the protocol proposed in the European Pharmacopeia (Ph.  
9  
10 128 Eur.) monograph of captopril.  
11  
12  
13

### 14 129 2.3 Analytical conditions

15  
16  
17  
18 130 Chemical analyses of samples were achieved by the Department of Laboratories in Paris  
19  
20 131 (AGEPS, AP-HP). Chromatographic analyses were performed using a Dionex Ultimate 3000  
21  
22 132 system (DIONEX, Ulis, France) coupled to a diode array detector. Chromatographic conditions  
23  
24 133 as well as suitability tests were performed as per the recommendations provided in the  
25  
26 134 monograph of amlodipine tablet (USP) and captopril (Ph. Eur.).  
27  
28  
29

30  
31 135 Identification of blisters was achieved using Fourier Transformed Infrared Spectroscopy (FTIR)  
32  
33 136 FTIR Perkin-Elmer Spectrum 2000® spectrometer (Villebon-sur-Yvette, France) with a diamond  
34  
35 137 crystal. Resolution, scan range and number of accumulated scans per spectrum were set to  
36  
37 138 0.5 cm<sup>-1</sup>, 4000 to 400 cm<sup>-1</sup> and 3, respectively. Spectrum were acquired on each side of the  
38  
39 139 blisters using attenuated total reflectance mode.  
40  
41  
42  
43  
44

### 45 140 2.4. Statistical analysis

46  
47  
48  
49 141 All statistical tests were performed using GraphPad Prism version 8.3.1. for Windows  
50  
51 142 (GraphPad Software, La Jolla California, USA). Nonparametric Spearman's correlation  
52  
53 143 coefficient (r) was calculated to measure the strength of the association between the peak  
54  
55 144 surface area of captopril and that of captopril disulfide. Mann-Whitney tests were used to  
56  
57  
58  
59  
60



1  
2  
3 145 compare the median between drugs with lower and those with higher protection from  
4  
5  
6 146 humidity packaging blisters.  
7  
8  
9

### 10 147 3. Results

#### 14 148 3.1. Collected drug samples

17 149 A total of 305 amlodipine and 235 captopril drug samples were collected in the ten countries.

20 150 The amount of drug samples collected as a function of the countries and their place of  
21  
22 151 purchase is summarized in Table 1. Overall, 150 of the 305 amlodipine and 140 of the 235  
23  
24 152 captopril drug samples considered in the study were obtained from licensed places of sale  
25  
26 153 (Table 1). 265 and 195 drug samples were respectively identified as amlodipine and captopril  
27  
28 154 generic drugs.  
29  
30

32 155 Table 1: number of collected amlodipine and captopril drug samples as a function of country  
33  
34 156 and place of purchase (i.e. licensed or unlicensed). DRC: Democratic Republic of the Congo;  
35  
36 157 NA : not applicable.  
37  
38  
39

|                       | Amlodipine |            |       | Captopril |            |       |
|-----------------------|------------|------------|-------|-----------|------------|-------|
|                       | Licensed   | Unlicensed | Total | Licensed  | Unlicensed | Total |
| Benin                 | 20         | 30         | 50    | 20        | 30         | 50    |
| Burkina Faso          | 10         | NA         | 10    | 20        | NA         | 20    |
| Congo-<br>Brassaville | NA         | 30         | 30    | 10        | 10         | 20    |
| Côte d'Ivoire         | 30         | 45         | 75    | 30        | 15         | 45    |
| DRC                   | 20         | NA         | 20    | 10        | NA         | 10    |
| Guinea                | NA         | 10         | 10    | NA        | 10         | 10    |
| Mauritania            | 20         | 20         | 40    | 30        | NA         | 30    |
| Niger                 | 30         | NA         | 30    | NA        | 10         | 10    |
| Senegal               | NA         | 20         | 20    | NA        | 20         | 20    |
| Togo                  | 20         | NA         | 20    | 20        | NA         | 20    |
| Total                 | 150        | 155        | 305   | 140       | 95         | 235   |

58  
59 158  
60

## 159 3.2. Chromatographic purity profiles of the drugs

### 160 3.2.1. Captopril samples

161 The qualitative study of the chromatograms of the 235 captopril drug samples showed that  
162 the 31 samples with drug amounts inferior to 90% (w/w%) contained the same impurity (Fig.  
163 1). The detected impurity was assigned to captopril disulfide as it had the same retention time  
164 than this compound.

165 Fig. 1: typical chromatographic profiles of captopril solutions: reference active substance  
166 standard solution (black), typical substandard drug sample (blue).

167 Further, for every chromatogram, the sum of the surface of the peak areas corresponding to  
168 captopril and that of captopril disulfide led to obtain areas recoveries between 90 and 110%  
169 compared to that of the captopril reference solution. Therefore, one could infer that the lack  
170 of drug captopril may be linked to the presence of captopril disulfide. As a result, a correlation  
171 study between the surface of the peak of captopril and that of captopril disulfide impurity was  
172 carried out and yielded a negative Spearman coefficient with a value of -0.613 ( $p=0.0069$ ).

### 173 3.2.2. Amlodipine samples

174 Unlike captopril, the 305 chromatographic profiles obtained for amlodipine samples strongly  
175 differed from one to the other, implying that the drugs did not contain the same impurities  
176 (Fig. 2). Indeed, under the analytical conditions recommended in the USP monograph, two  
177 categories of chromatographic profiles were obtained as a function of the studied samples.

178 A first category of chromatographic profiles consisted of samples containing an impurity with  
179 a relative retention time of about 0.5 (Fig 2. a) as compared to amlodipine, referred in the USP

1  
2  
3 180 as amlodipine related compound A. In 10 chromatograms, the surface of the peak of this  
4  
5 181 impurity exceeded the USP acceptance criteria for this impurity (<1.0 %, w/w).

6  
7  
8  
9 182 The second category of chromatographic profiles comprised a peak with a relative retention  
10  
11 183 time of about 0.8 (Fig 2.b) corresponding to a degradation related impurity, namely an  
12  
13 184 amlodipine-lactose interaction product. For 30 sample solutions, the area of the peak of this  
14  
15 185 impurity compared to that of amlodipine exceeded the USP acceptance criteria for this  
16  
17 186 impurity (<0.5% w/w).

18  
19  
20  
21  
22 187 Fig. 2: typical chromatographic profiles for samples containing impurity A (a) and samples  
23  
24 188 containing amlodipine-lactose interaction product (b).

### 25 26 27 28 189 3.3. Blisters identification

29  
30  
31  
32 190 The identity and aspect of the blisters materials strongly differed between amlodipine and  
33  
34 191 captopril and within drug samples of the same drug.

35  
36  
37  
38 192 FTIR analysis were performed on each side of the plastic blisters in order to identify its main  
39  
40 193 compounds. Based on the analysis, two groups could be established: those with a spectrum  
41  
42 194 corresponding to polyvinyl-chloride's one (PVC, red and blue spectrum, Fig. 3) and those which  
43  
44 195 have two spectral bands ( $597$  and  $527\text{ cm}^{-1}$ ) characteristic of the polyvinylidene-chloride  
45  
46 196 presence<sup>13</sup> (PVDC, green spectrum, Fig. 3).

47  
48  
49  
50  
51 197 Fig. 3: typical FTIR spectrum of a polyvinyl-chloride (PVC) polymer packaging with (green  
52  
53 198 spectrum) and without (blue and red spectrum) polyvinylidene-chloride (PVDC).

54  
55  
56  
57 199 The analysis highlighted that 105 out of the 235 captopril drug samples were packaged in  
58  
59 200 blisters containing PVDC and 130 in blisters only composed of PVC. In the case of amlodipine,

201 none of the plastic blisters used to package the 245 amlodipine samples contained PVDC  
 202 (Table 2). 60 amlodipine samples were packaged in blisters consisting of foil-foil sealed  
 203 aluminium (Table 2).

204 Table 2: number of amlodipine and captopril drug samples as a function of blister identity.  
 205 PVC: polyvinyl-chloride; PVDC: polyvinylidene-chloride.

| Blister identity | Amlodipine | Captopril |
|------------------|------------|-----------|
| PVC only         | 245        | 130       |
| Aluminium only   | 60         | None      |
| PVC-PVDC         | None       | 105       |

### 207 3.4. Drugs assays as a function of blister identifications

208 From the results obtained in 3.2., captopril assays results were separated based on the  
 209 presence of PVDC or not (PVC only). Amlodipine assay results were divided in two groups: the  
 210 group of samples packaged in foil-foil sealed aluminium blisters and the one packaged in PVC  
 211 blisters (PVC only). The results are provided in figure 4.

212 Fig.4: medians of drug assays with interquartile ranges as a function of the drug and the blister  
 213 composition. PVC: polyvinyl-chloride; PVDC: polyvinylidene-chloride; ns: non statistically  
 214 significant; \*\*\*\*:  $p < 0.0001$ .

215 For amlodipine, no statistical difference in dosage ( $p = 0.7684$ ) was observed between the  
 216 group with foil-foil aluminium packaging (median=96.10,  $n = 60$ ) and the group with PVC blister  
 217 packaging (median=96.60,  $n = 245$ ).

1  
2  
3 218 For captopril, on the other hand, a statistical difference ( $p < 0.0001$ ) was found between the  
4  
5 219 group of samples stored in blisters containing only PVC (median=96.60, n=130) and those  
6  
7  
8 220 stored in blisters containing PVC/PVDC (median=100.0, n=105).  
9  
10

## 11 221 4. Discussion

12  
13  
14  
15  
16 222 Sub-standard cardiac medicines represent a serious health hazard and result in significant  
17  
18 223 morbidity and mortality<sup>4</sup>. The SEVEN study was the first major study of cardiovascular drugs  
19  
20 224 in Sub-Saharan Africa<sup>5-7</sup>. The analysis of samples collected in Africa and through various sales  
21  
22 225 spots of all kinds showed that among the products used in cardiovascular diseases, about 15-  
23  
24 226 20% were of low quality, and the prevalence of poor quality is higher for the products  
25  
26 227 containing amlodipine and captopril. Given this observation and the fact that these two active  
27  
28 228 substances are particularly sensitive to humidity and heat, the question arose as to whether  
29  
30 229 the intrinsic stability of the latter had contributed more to the quality defects highlighted at  
31  
32 230 the time. So, in this follow-up study, we have sought to provide some answers to this question  
33  
34 231 by focusing on the search of associated degradation products and the nature of the packaging  
35  
36 232 used at the time of the on-site collections.  
37  
38  
39  
40  
41  
42  
43  
44

45 233 We therefore sought to supplement the assay results with chromatographic purity studies on  
46  
47 234 samples of the various cardiological drugs samples collected during the SEVEN study. We  
48  
49 235 noted that the levels of impurities are particularly high for captopril and amlodipine samples  
50  
51 236 ( $>0.5\%$  compared to the considered active substance), as is their high prevalence of  
52  
53 237 underdosing relative to other products, as previously mentioned. Of course, this problem  
54  
55 238 could have been caused by the use of poor-quality active ingredient. But the fact that it is  
56  
57 239 specific to these two active substances did not allow us to limit to this aspect alone. We  
58  
59  
60

1  
2  
3 240 therefore also turned our attention to the stability issue and to what goes hand in hand with  
4  
5 241 this aspect. The identification of chromatographic impurities present concomitantly with the  
6  
7  
8 242 active substance was carried out to support our hypotheses related to the degradation of  
9  
10 243 these compounds.

11  
12  
13  
14 244 In the case of the captopril drug samples, the compound detected (Fig. 1) in addition to  
15  
16 245 captopril was identified as captopril disulfide, a well-known degradation product of captopril  
17  
18 246 that is prompt to be formed under moisture and heat<sup>14</sup>. In other words, this would mean that  
19  
20  
21 247 the underdoses initially observed in the captopril products<sup>6</sup> could be attributed to the poor  
22  
23 248 quality of the active substance used and/or, to a larger extent, to degradation occurring either  
24  
25  
26 249 during manufacture and/or during improper storage. However, as it is well depicted that  
27  
28  
29 250 captopril is far more susceptible to degradation in the presence of some excipients than alone  
30  
31 251 <sup>15,16</sup>, one can fathom that the presence of captopril disulfide may more likely result from  
32  
33 252 degradation due to uncontrolled exposure. As for amlodipine, chromatographic analyses  
34  
35  
36 253 showed in 30 samples the presence of an impurity due to amlodipine-lactose interaction (Fig.  
37  
38 254 2 b). Such interaction was shown to occur in time and mostly under high humidity conditions<sup>17</sup>,  
39  
40  
41 255 which could, to some extent, explain the poor assays observed in SEVEN study<sup>7</sup>.

42  
43  
44 256 These results are consistent with data in the literature in that the moisture vapour  
45  
46 257 transmission rate<sup>18</sup> (MVTR) must be controlled as it is critical to the stability of captopril<sup>14</sup> and  
47  
48  
49 258 amlodipine<sup>19</sup>. The corollary is that we have indeed shown, in the case of captopril, a significant  
50  
51  
52 259 difference ( $p < 0.0001$ , Fig. 4) in active substance content between tablets extracted from PVC  
53  
54 260 blisters and those from PVC-PVDC blisters that exhibit lower MVTR<sup>18</sup>. The results for  
55  
56  
57 261 amlodipine are not statistically conclusive, but somehow the trend is noticeable since samples  
58  
59 262 with a peak area of the amlodipine-lactose interaction product greater than 0.5% (w/w) were  
60

1  
2  
3 263 exclusively from the blisters with higher MVTR i.e. the blisters composed of PVC as opposed  
4  
5 264 to the foil-foil aluminium ones<sup>18</sup>. Accordingly, it can be seen that the use of low moisture  
6  
7  
8 265 barrier packaging for these two products among the different cardiac drugs tested appears to  
9  
10 266 have contributed to their low assay values.

11  
12  
13  
14 267 This poor quality, represented by both a lower active substance content and the presence of  
15  
16 268 degradation products, subjects the patient to safety risks. On the one hand, any dose lower  
17  
18 269 than the dose to which the body has developed tolerance may induce an effect that is difficult  
19  
20 270 to predict and may even be contrary to the action of the usual dose<sup>20</sup>. On the other hand, the  
21  
22 271 degradation products formed may be toxic<sup>21</sup>.

23  
24  
25  
26  
27 272 Captopril disulphide is a well-known metabolite of captopril, which can reversibly interconvert  
28  
29 273 into captopril in the blood<sup>22</sup>. However, in human pharmacokinetic studies the amount of  
30  
31 274 captopril disulphide in the blood never exceeds 8% of that of captopril<sup>22,23</sup>. Therefore, clinical  
32  
33 275 consequences of exposure to higher amounts of captopril disulfide are unknown. This is to be  
34  
35 276 considered because the disulfide metabolites of sulfur-based drugs were 50 to 100 times more  
36  
37 277 toxic on hepatocytes from isolated rats than the parent drugs<sup>24</sup>.

38  
39  
40  
41  
42  
43 278 In some amlodipine samples, two main degradation products were detected as mentioned  
44  
45 279 earlier, amlodipine impurity A that corresponds to the oxidation of its dihydropyridine ring  
46  
47 280 and the amlodipine-lactose interaction product. Impurity A has been reported to be among  
48  
49 281 the most found metabolites in urines (7%)<sup>25</sup>. As its level was always inferior to 2% relative to  
50  
51 282 the active substance in the samples analysed, one can assume that this presence may have a  
52  
53 283 limited impact to the patients. As for the amlodipine-lactose interaction product, no data are  
54  
55 284 currently available on its fate in the body and its toxicity, which makes it a risk to consider.  
56  
57  
58  
59  
60

1  
2  
3 285 Overall, on the basis of these additional results from the study of the chromatographic profiles  
4  
5 286 of the collected samples, significant quantities of cardio drugs sold on African soil may not  
6  
7  
8 287 only present a lack of efficacy but also safety issues, due to the presence of impurities and/or  
9  
10 288 degradation products resulting from poor storage and packaging conditions.  
11  
12  
13

#### 14 289 4.1. Limitations of the study

15  
16  
17  
18 290 This study is of an observational type and even if as much information as possible has been  
19  
20 291 collected for the research and attribution of causes likely to be at the origin of the active  
21  
22  
23 292 substance dosage defect, other factors than those related to packaging and storage problems  
24  
25 293 may be involved. The lack of active substance is most likely multi-factorial and it may be useful  
26  
27  
28 294 to explore with more samples when applicable.  
29  
30

## 31 295 Conclusion

32  
33  
34 296 Further studies of captopril and amlodipine samples from Africa showed that their low assays  
35  
36 297 would result in part from the degradation of the active substance, which may indicate that  
37  
38  
39 298 protective measures to avoid degradation of the drug products were not commensurate with  
40  
41  
42 299 their unstable behaviour, particularly in the presence of moisture and heat. FTIR analyses of  
43  
44 300 the samples' blisters disclosed they differ in material composition for a same active substance.  
45  
46  
47 301 In the case of captopril, statistical analysis has shown that the active substance content of  
48  
49 302 products in tighter blister packs is higher than that of products in less moisture-resistant  
50  
51 303 packaging. In the case of amlodipine, only the samples with low moisture resistant packaging  
52  
53  
54 304 had high amounts (>0.5% w/w) of degradation products.  
55  
56  
57 305 Using packaging with elevated moisture barrier properties could be a significant leverage to  
58  
59  
60 306 reduce the prevalence of substandard drugs in countries where medicines circuit and storage



1  
2  
3 307 are poorly controlled. It is therefore also important to make the health authorities in these  
4  
5 308 countries aware that the quality of packaging must also be taken into account when evaluating  
6  
7  
8 309 medicines supplied.  
9  
10

## 11 310 Figure legend/caption

12  
13  
14 311 Table 1: number of collected amlodipine and captopril drug samples as a function of country  
15  
16 312 and place of purchase (i.e. licensed or unlicensed). DRC: Democratic Republic of the Congo;  
17  
18  
19 313 NA : not applicable.  
20  
21

22  
23 314 Table 2: number of amlodipine and captopril drug samples as a function of blister identity.  
24  
25 315 PVC: polyvinyl-chloride; PVDC: polyvinylidene-chloride.  
26  
27

28  
29 316 Fig. 1: typical chromatographic profiles of captopril solutions: reference active substance  
30  
31 317 standard solution (black), typical substandard drug sample (blue).  
32  
33

34  
35 318 Fig. 2: typical chromatographic profiles for samples containing impurity A (a) and samples  
36  
37 319 containing amlodipine-lactose interaction product (b).  
38  
39

40  
41 320 Fig. 3: typical FTIR spectrum of a polyvinyl-chloride (PVC) polymer packaging with (green  
42  
43 321 spectrum) and without (blue and red spectrum) polyvinylidene-chloride (PVDC).  
44  
45

46  
47 322 Fig. 4: medians of drug assays with interquartile ranges as a function of the drug and the blister  
48  
49 323 composition. PVC: polyvinyl-chloride; PVDC: polyvinylidene-chloride; ns: non statistically  
50  
51 324 significant; \*\*\*\*:  $p < 0.0001$ .  
52

## 53 325 Footnotes

### 54 326 Contributors

55  
56  
57 327 All authors have substantial contributions.

58  
59 328 Study concept and design: PH. Secretan, B. Do, M. Antignac and X. Jouven  
60

329 Responsible of samples collection: S. Ikama Meo, R. N' Guetta, D. Balde, A. Sidy Ali, P.  
330 Zabsonre, JL. Takombe.

331 Chemical analysis: M. Bernard, B. Do, PH Secretan and Najet Yagoubi.

332 Interpretation of data: all authors.

333 Statistical analysis: PH. Secretan, B. Do, MC Perier, M. Antignac and X. Jouven.

334 Drafting of the manuscript: all authors.

335 Final approval of the version to be published: all authors.

### 336 Funding

337 The SEVEN Study was exclusively supported by grant AAP-2014-042 from the Agence  
338 Nationale de Sécurité du Médicament et des Produits de Santé as well as by Institut National  
339 de la Santé et de la Recherche Médicale (grant : N/A), Assistance Publique - Hôpitaux de Paris  
340 (grant : N/A), and Paris Descartes University (grant : N/A).

341

### 342 Competing interests

343 None declared.

### 344 Patient and public involvement

345 Patients and/or the public were not involved in the design, conduct, reporting or  
346 dissemination of this research.

### 347 Patient consent for publication

348 Not required.

### 349 Data sharing statement

350 No additional data available.

## References

1. Nayyar, G. M. L. *et al.* Falsified and Substandard Drugs: Stopping the Pandemic. *Am. J. Trop. Med. Hyg.* **100**, 1058–1065 (2019).
2. Johnston, A. & Holt, D. W. Substandard drugs: a potential crisis for public health: Substandard drugs. *Br. J. Clin. Pharmacol.* **78**, 218–243 (2014).
3. Almuzaini, T., Choonara, I. & Sammons, H. Substandard and counterfeit medicines: a systematic review of the literature. *BMJ Open* **3**, e002923 (2013).
4. Bowry, A. D. K., Lewey, J., Dugani, S. B. & Choudhry, N. K. The Burden of Cardiovascular Disease in Low- and Middle-Income Countries: Epidemiology and Management. *Can. J. Cardiol.* **31**, 1151–1159 (2015).
5. Antignac, M. *et al.* Quality Assessment of 7 Cardiovascular Drugs in 10 Sub-Saharan Countries: The SEVEN Study. *JAMA Cardiol.* **2**, 223 (2017).
6. Antignac, M. *et al.* Fighting fake medicines: First quality evaluation of cardiac drugs in Africa. *Int. J. Cardiol.* **243**, 523–528 (2017).
7. Macquart de Terline, D. *et al.* Substandard drugs among five common antihypertensive generic medications: an analysis from 10 African countries. *J. Hypertens.* **36**, 395–401 (2018).
8. Khan, M. H. *et al.* Effects of packaging and storage conditions on the quality of amoxicillin-clavulanic acid – an analysis of Cambodian samples. *BMC Pharmacol. Toxicol.* **14**, 33 (2013).
9. Asafu-Adjaye, E. B. *et al.* Comparative stability study of unit-dose repackaged furosemide tablets. *Clin. Res. Regul. Aff.* **28**, 38–48 (2011).

- 1  
2  
3 373 10. Ogbonna, A. C. & Harris, D. J. Thermal comfort in sub-Saharan Africa: Field study report in  
4  
5 374 Jos-Nigeria. *Appl. Energy* **85**, 1–11 (2008).  
6  
7  
8 375 11. Scrivens, G. *et al.* The Humidity Exposure of Packaged Products. in *Accelerated Predictive*  
9  
10 376 *Stability* 105–146 (Elsevier, 2018). doi:10.1016/B978-0-12-802786-8.00005-X.  
11  
12  
13 377 12. Newton, P. N. *et al.* Guidelines for Field Surveys of the Quality of Medicines: A Proposal.  
14  
15 378 *PLOS Med.* **6**, e1000052 (2009).  
16  
17  
18 379 13. Bower, D. I. & Maddams, W. F. *The Vibrational Spectroscopy of Polymers.* (Cambridge  
19  
20 380 University Press, 1989). doi:10.1017/CBO9780511623189.  
21  
22  
23 381 14. França, L. de M. *et al.* NIR hyperspectral imaging to evaluate degradation in captopril  
24  
25 382 commercial tablets. *Eur. J. Pharm. Biopharm.* **104**, 180–188 (2016).  
26  
27  
28 383 15. Tôrres, A. R., Grangeiro, S. & Fragoso, W. D. Multivariate control charts for monitoring  
29  
30 384 captopril stability. *Microchem. J.* **118**, 259–265 (2015).  
31  
32  
33 385 16. Stulzer, H. K., Rodrigues, P. O., Cardoso, T. M., Matos, J. S. R. & Silva, M. A. S. Compatibility  
34  
35 386 studies between captopril and pharmaceutical excipients used in tablets formulations. *J.*  
36  
37 387 *Therm. Anal. Calorim.* **91**, 323–328 (2008).  
38  
39  
40 388 17. Abdoh, A., Al-Omari, M. M., Badwan, A. A. & Jaber, A. M. Y. Amlodipine Besylate–  
41  
42 389 Excipients Interaction in Solid Dosage Form. *Pharm. Dev. Technol.* **9**, 15–24 (2004).  
43  
44  
45 390 18. Waterman, K. C. & Macdonald, B. C. Package Selection for Moisture Protection for Solid,  
46  
47 391 Oral Drug Products. *J. Pharm. Sci.* **99**, 4437–4452 (2010).  
48  
49  
50 392 19. Malcolm, L. Accelerated Stability Assessment Program (ASAP) Applications in a  
51  
52 393 Postapproval Environment. in *Accelerated Predictive Stability* 287–304 (Elsevier, 2018).  
53  
54 394 doi:10.1016/B978-0-12-802786-8.00012-7.  
55  
56  
57  
58  
59  
60

- 1  
2  
3 395 20. Peper, A. Aspects of the Relationship between Drug Dose and Drug Effect. *Dose-Response*  
4  
5 396 7, dose-response.0 (2009).  
6  
7  
8 397 21. Melo, S. R. d. O., Homem-de-Mello, M., Silveira, D. & Simeoni, L. A. Advice on Degradation  
9  
10 398 Products in Pharmaceuticals: A Toxicological Evaluation. *PDA J. Pharm. Sci. Technol.* **68**,  
11  
12 399 221–238 (2014).  
13  
14  
15  
16 400 22. Migdalof, B. H. *et al.* Captopril: Pharmacology, Metabolism, and Disposition. *Drug Metab.*  
17  
18 401 *Rev.* **15**, 841–869 (1984).  
19  
20  
21 402 23. Duchin, K. L., McKinstry, D. N., Cohen, A. I. & Migdalof, B. H. Pharmacokinetics of Captopril  
22  
23 403 in Healthy Subjects and in Patients with Cardiovascular Diseases: *Clin. Pharmacokinet.* **14**,  
24  
25 404 241–259 (1988).  
26  
27  
28  
29 405 24. Jatoe, S. D., Lauriault, V., McGirr, L. G. & O'Brien, P. J. THE TOXICITY OF DISULPHIDES TO  
30  
31 406 ISOLATED HEPATOCYTES AND MITOCHONDRIA. *Drug Metabol. Drug Interact.* **6**, (1988).  
32  
33  
34  
35 407 25. Stopher, D. A., Beresford, A. P., Macrae, P. V. & Humphrey, M. J. The Metabolism and  
36  
37 408 Pharmacokinetics of Amlodipine in Humans and Animals: *J. Cardiovasc. Pharmacol.* **12**,  
38  
39 409 S55–S59 (1988).  
40  
41  
42  
43 410

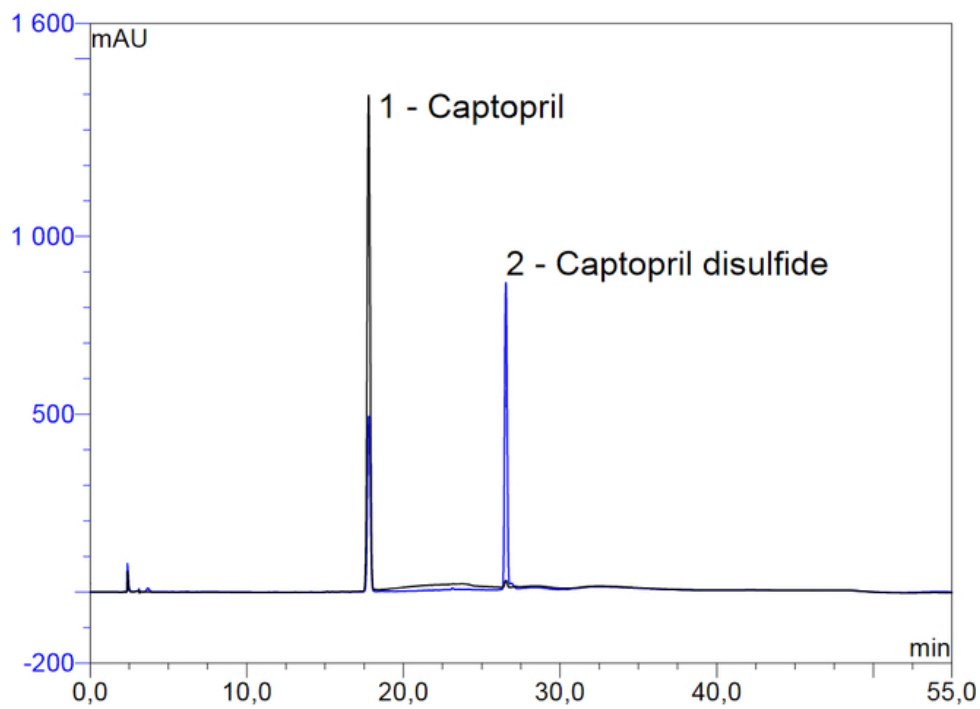

Fig. 1: typical chromatographic profiles of captopril solutions: reference active substance standard solution (black), typical substandard drug sample (blue).

57x42mm (300 x 300 DPI)

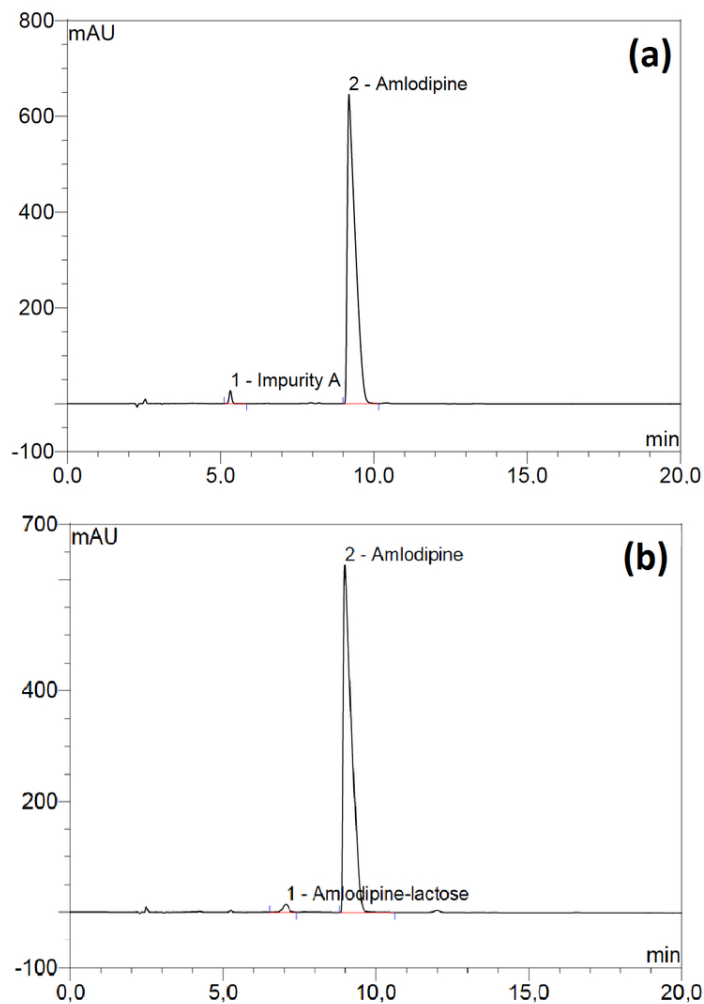

Fig. 2: typical chromatographic profiles for samples containing impurity A (a) and samples containing amlodipine-lactose interaction product (b).

90x91mm (300 x 300 DPI)

1  
2  
3  
4  
5  
6  
7  
8  
9  
10  
11  
12  
13  
14  
15  
16  
17  
18  
19  
20  
21  
22  
23  
24  
25  
26  
27  
28  
29  
30  
31  
32  
33  
34  
35  
36  
37  
38  
39  
40  
41  
42  
43  
44  
45  
46  
47  
48  
49  
50  
51  
52  
53  
54  
55  
56  
57  
58  
59  
60

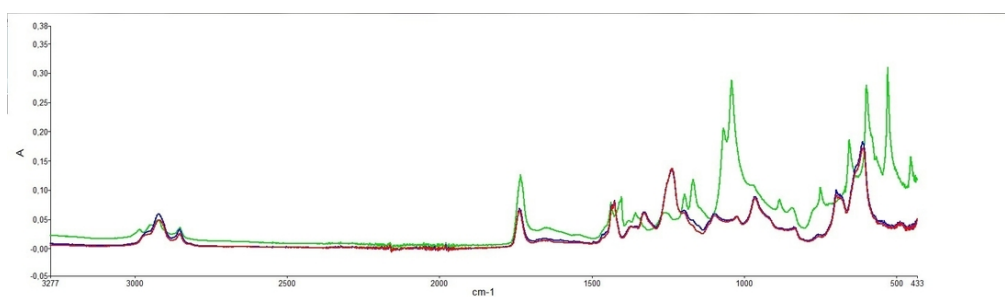

Fig. 3: typical FTIR spectrum of a polyvinyl-chloride (PVC) polymer packaging with (green spectrum) and without (blue and red spectrum) polyvinylidene-chloride (PVDC).

92x37mm (300 x 300 DPI)



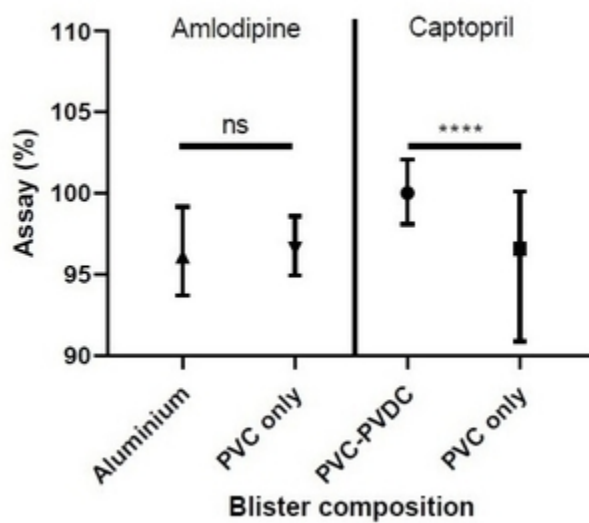

Fig.4: medians of drug assays with interquartile ranges as a function of the drug and the blister composition. PVC: polyvinyl-chloride; PVDC: polyvinylidene-chloride; ns: non statistically significant; \*\*\*\*:  $p < 0.0001$ .

27x24mm (300 x 300 DPI)
